1

**TITLE**

2

**Lysine63-linked ubiquitin chains earmark GPCRs for BBSome-**

3

**mediated removal from cilia**

4

**AUTHORS:** Swapnil Rohidas Shinde, Andrew R. Nager<sup>#</sup> and Maxence V. Nachury\*

5

**AFFILIATION:**

6

Department of Ophthalmology, University of California San Francisco, CA 94143, USA

7

8

\* Correspondence: [maxence.nachury@ucsf.edu](mailto:maxence.nachury@ucsf.edu)

9

<sup>#</sup> Current address: Cancer Immunology Discovery, Pfizer Inc., San Diego, CA, 92121, USA

10 **ABSTRACT (158 words)**

11 Regulated trafficking of G-protein coupled receptors (GPCRs) controls cilium-based signaling  
12 pathways.  $\beta$ -arrestin, a molecular sensor of activated GPCRs, and the BBSome, a complex of  
13 Bardet-Biedl Syndrome (BBS) proteins, are required for the signal-dependent exit of ciliary  
14 GPCRs but the functional interplay between  $\beta$ -arrestin and the BBSome remains elusive. Here  
15 we find that, upon activation, ciliary GPCRs become tagged with K63-linked ubiquitin (K63Ub)  
16 chains in a  $\beta$ -arrestin-dependent manner prior to BBSome-mediated exit. Removal of ubiquitin  
17 acceptor residues from the somatostatin receptor 3 (SSTR3) and from the orphan GPCR  
18 GPR161 demonstrates that ubiquitination of ciliary GPCRs is required for their regulated exit  
19 from cilia. Furthermore, targeting a K63Ub-specific deubiquitinase to cilia blocks the exit of  
20 GPR161, SSTR3 and Smoothed (SMO) from cilia. Finally, ubiquitinated proteins accumulate  
21 in cilia of mammalian photoreceptors and *Chlamydomonas* cells when BBSome function is  
22 compromised. We conclude that K63Ub chains mark GPCRs and other unwanted ciliary  
23 proteins for recognition by the ciliary exit machinery.

24

25

## 26 INTRODUCTION

27 The regulated trafficking of signaling receptors in and out of cilia is a central regulatory  
28 mechanism of many cilia-based signaling pathways (Nachury and Mick, 2019; Anvarian et al.,  
29 2019; Mykityn and Askwith, 2017; Gigante and Caspary, 2020). For example, upon activation of  
30 the Hedgehog signaling pathway, the Hedgehog receptor Patched 1 and the G protein-coupled  
31 receptor (GPCR) GPR161 disappear from cilia while GPCR Smoothened (SMO) accumulates in  
32 cilia (Rohatgi et al., 2007; Corbit et al., 2005; Mukhopadhyay et al., 2013). In all three cases,  
33 regulated exit from cilia plays a major role in the on-demand redistribution of signaling  
34 molecules (Nachury and Mick, 2019). Signal-dependent exit is likely to be a general characteristic  
35 of ciliary GPCRs as the Somatostatin Receptor 3 (SSTR3), the Dopamine Receptor 1 (D1R), the  
36 Melanocortin concentrating hormone receptor 1 (MCHR1) and the neuropeptide receptor 2  
37 (NPY2R) all disappear from cilia upon exposure to agonist (Domire et al., 2011; Loktev and  
38 Jackson, 2013; Nager et al., 2017; Green et al., 2015). A major question is how GPCRs are  
39 selected for removal from cilia in an activity-dependent manner.

40 The major trafficking entities mediating signal-dependent exit from cilia are the BBSome and  $\beta$ -  
41 arrestin 2. The BBSome is an evolutionarily conserved complex of eight Bardet-Biedl Syndrome  
42 (BBS) proteins that directly recognizes intracellular determinants in GPCRs and ferries them out  
43 of cilia (Nachury, 2018; Wingfield et al., 2018). The BBSome associates with the intraflagellar  
44 transport (IFT) machinery and has been proposed to act as adaptor between the motor-driven  
45 intraflagellar transport trains and the membrane proteins that are to be removed from cilia.  
46 Because the BBSome is not known to have the ability to discriminate active from inactive  
47 GPCRs, there must exist another layer of regulation that commits activated GPCRs for exit.  $\beta$ -  
48 arrestin 2 is a well-established molecular sensor of the activation state of GPCRs that is required  
49 for the signal-dependent exit of GPR161 and SSTR3 (Pal et al., 2016; Green et al., 2015; Nager  
50 et al., 2017). No association of  $\beta$ -arrestin 2 with ciliary trafficking complexes has been reported to  
51 date and it remains unclear how  $\beta$ -arrestin 2 relays information regarding the state of activation  
52 of ciliary GPCRs to the ciliary exit machinery.

53 An emerging player in ciliary exit is ubiquitination (Shearer and Saunders, 2016). Ubiquitin (Ub),  
54 a 76-amino acid polypeptide, becomes conjugated to acceptor lysine residues on substrate  
55 proteins by ubiquitin ligases and tags substrates for degradation or other regulatory fates (Yau  
56 and Rape, 2016; Swatek and Komander, 2016). A role for ubiquitin in promoting ciliary exit is  
57 suggested by multiple lines of evidence. First, interfering with Patched1 ubiquitination blocks its  
58 signal-dependent exit from cilia (Kim et al., 2015; Yue et al., 2014). Second, fusing ubiquitin to  
59 PKD-2, the olfactory receptor ODR-10 or the TRP channel OSM-9 at their cytoplasmic end  
60 results in the disappearance of these proteins from cilia (Hu et al., 2007; Xu et al., 2015). The  
61 accumulation of these ubiquitin fusions inside cilia when BBSome function is compromised  
62 suggests that the BBSome might sort ubiquitinated signaling receptors out of cilia, in line with a  
63 reported association of BBSome with ubiquitinated proteins in trypanosomes (Langousis et al.,  
64 2016). Interestingly, TRIM32 is a ubiquitin ligase mutated in BBS patients (Chiang et al., 2006).  
65 Third, the ubiquitin ligase Cbl is recruited to cilia upon activation of the ciliary tyrosine kinase  
66 receptor PDGFR $\alpha$  and Cbl is required for termination of PDGFR $\alpha$  signaling (Schmid et al.,  
67 2018). Last, a dramatic rise in ubiquitination of the ciliary proteome is observed when  
68 *Chlamydomonas* cilia disassemble (Huang et al., 2009). In particular,  $\alpha$ -tubulin becomes  
69 ubiquitinated on K304 upon cilia disassembly and expression of  $\alpha$ -tubulin[K304R] slows down  
70 cilia disassembly (Wang et al., 2019).

71 After conjugation onto substrates, ubiquitin itself often serves as a substrate for ubiquitination.  
72 The resulting ubiquitin chains are characterized by the acceptor lysine residue on ubiquitin with  
73 lysine 48-linked Ub (UbK48) chains targeting soluble proteins for proteasomal degradation while  
74 lysine 63-linked Ub (UbK63) chains assembled onto membrane proteins constitute the major  
75 driver for sorting from the limiting membrane of late endosomes into intraluminal vesicles and  
76 ultimately lysosomal degradation (Piper et al., 2014; Yau and Rape, 2016; Swatek and  
77 Komander, 2016). Intriguingly, in shortening *Chlamydomonas* cilia K63Ub linkages predominate  
78 at least 5-fold over K48 linkages and only K63Ub linkages are detected on  $\alpha$ -tubulin. A role for  
79 K63Ub chains in ciliary trafficking remains to be determined.

80 Together, these data led us to investigate the interplay between ubiquitination,  $\beta$ -arrestin 2 and  
81 the ciliary exit machinery. Using a combination of cellular imaging, biochemical studies and  
82 cilia-specific manipulations, we find that  $\beta$ -arrestin 2 directs the activation-dependent addition of  
83 K63-linked ubiquitin chains onto ciliary GPCRs that are then selected by the BBSome for  
84 removal from cilia.

## 85 RESULTS

### 86 Signal-dependent ubiquitination of ciliary GPCRs is required for their regulated 87 exit from cilia

88 As a first step in investigating the interplay between ubiquitination and the ciliary exit machinery,  
89 we sought to determine whether activation of ciliary GPCRs leads to their ubiquitination inside  
90 cilia prior to retrieval into the cell. We blocked BBSome-dependent exit by deleting its cognate  
91 GTPase ARL6/**BBS3 in mouse inner medulla collecting duct (IMCD3) cells. IMCD3 cells**  
92 **represent a validated cell culture system to study ciliary trafficking and the IMCD3 *Arl6*<sup>-/-</sup> line has**  
93 **been previously characterized (Liew et al., 2014; Ye et al., 2018). As in previous studies (Ye et al.,**  
94 **2018; Nager et al., 2017), all GPCRs were expressed at near-endogenous levels by driving**  
95 **expression with extremely weak promoters. The fluorescent protein mNeonGreen (NG) fused to**  
96 **the cytoplasm-facing C-terminus of GPCRs allowed direct visualization. A biotinylation**  
97 **Acceptor Peptide (AP) fused to the extracellular N-terminus biotinylated by an ER-localized**  
98 **biotin ligase (BirA-ER) enabled pulse labeling of surface-exposed molecules and denaturing**  
99 **purifications.** When SSTR3 was expressed in *Arl6*<sup>-/-</sup> IMCD3 cells, addition of its agonist  
100 somatostatin (sst) led to a drastic increase in the ciliary levels of ubiquitin observed upon  
101 immunostaining with the well-characterized FK2 (**Figure 1A-B**) and FK1 (**Figure S1A-B**)  
102 monoclonal antibodies (Fujimuro et al., 1994; Emmerich and Cohen, 2015; Haglund et al.,  
103 2003). All further experiments were conducted with the FK2 antibody. *Arl6*<sup>-/-</sup> cells accumulated  
104 Ub signals inside cilia in the absence of SSTR3 expression (**Figure 1A-B**), demonstrating that  
105 some endogenous proteins become ubiquitinated inside the cilia of *Arl6*<sup>-/-</sup> IMCD3 cells. No  
106 ubiquitin signal was detected inside cilia when BBSome function was intact (**Figure 1A-B and**  
107 **S1A-D**), indicating that the BBSome efficiently removes ubiquitinated proteins from cilia.  
108 Because the sst-dependent increase in ciliary ubiquitin signal depends upon SSTR3 expression  
109 (**Figure 1A-B**), these results suggest that either SSTR3 itself **or a downstream effector of SSTR3**  
110 become ubiquitinated inside cilia upon activation.

111 To determine whether SSTR3 becomes ubiquitinated in response to sst, we biochemically  
112 isolated <sup>AP</sup>SSTR3<sup>NG</sup> under denaturing conditions via the biotinylated AP tag and probed for  
113 ubiquitin via an HA tag on transfected HA-Ub. As typical for a glycosylated protein, SSTR3  
114 migrated as a broad band centered around 100 kDa (**Figure 1C**). The amount of SSTR3  
115 recovered did not change appreciably between WT and *Arl6*<sup>-/-</sup> cells or upon stimulation with sst  
116 (**Figure 1C**). Remarkably, while only very faint Ub signals were detected associated with SSTR3  
117 in WT cells, a Ub smear extending from 100 kDa upward was detected in the SSTR3 pull-downs  
118 from *Arl6*<sup>-/-</sup> cells. Furthermore, stimulation with sst resulted in a modest but reproducible  
119 increase in SSTR3 ubiquitination in *Arl6*<sup>-/-</sup> cells (**Figure 1D**). We conclude that the  
120 BBSome/ARL6 system is required for the degradation of ubiquitinated SSTR3 and that SSTR3  
121 becomes ubiquitinated in response to stimulation with sst.

122 We next sought to test whether signaling receptors endogenous to IMCD3 cells are ubiquitinated  
123 inside cilia in an activity-dependent manner. One signaling pathway that is natively expressed in  
124 IMCD3 cells is the Hedgehog pathway. Prior experiments have detected normal trafficking  
125 dynamics of SMO and GPR161 in IMCD3 cells (Ye et al., 2018; Mukhopadhyay et al., 2013)  
126 and **Figure 4D**). As GPR161 and SMO both accumulate in cilia of *Arl6*<sup>-/-</sup> cells without Hh  
127 pathway stimulation (Liew et al., 2014; Zhang et al., 2011), the ubiquitin signal detected in *Arl6*<sup>-/-</sup>  
128 cilia may correspond to ubiquitin conjugated to SMO or GPR161. We detected a significant  
129 elevation of the ciliary ubiquitin levels in *Arl6*<sup>-/-</sup> cells when treated with the SMO agonist SAG  
130 (**Figure 1E-F**). Because SMO ubiquitination was previously shown to decrease upon its  
131 activation (Xia et al., 2012; Jiang et al., 2019), it is likely that the elevated ciliary ubiquitin signal  
132 detected in SAG-treated cells is associated with GPR161. As activation of SMO triggers exit of  
133 GPR161 but this exit is frustrated when BBSome function goes awry, these data suggest that  
134 GPR161 becomes ubiquitinated prior to its BBSome-dependent exit. Collectively, these data  
135 suggest that GPCRs are ubiquitinated in a regulated fashion inside cilia and subsequently  
136 retrieved into the cell by the BBSome.

137 To test the functional importance of GPCR ubiquitination in BBSome-mediated exit from cilia,  
138 we removed all ubiquitination sites from SSTR3 and GPR161 by mutating all cytoplasm-

139 exposed lysine residues to arginine (cK0 variants). Exit kinetics were precisely monitored by real-  
140 time tracking of individual cilia in live cells. In both cases, the cK0 variant underwent markedly  
141 slower signal-dependent exit from cilia than the WT allele (**Figure 2A-B**). Measurement of exit  
142 rates revealed that exit of SSTR3cK0 was ~2-fold slower than SSTR3 and that exit of  
143 GPR161cK0 was ~2.5-fold slower than GPR161. The residual exit rates of the cK0 mutants  
144 indicate the existence of alternative mechanisms of exit that complement GPCR ubiquitination  
145 or bypass BBSome-dependent retrieval (see discussion).

146 To rule out that the observed ciliary exit defect of the cK0 mutants was an indirect consequence  
147 of defective endocytosis for example because of clogging of the ciliary exit path, we directly  
148 assessed endocytosis of SSTR3 and SSTR3cK0. The surface-exposed pool of <sup>AP</sup>SSTR3 was pulse  
149 labeled with fluorescently labeled monovalent streptavidin (mSA) and cells were stimulated with  
150 sst. The faint hazy signal corresponding to the plasma membrane pool of SSTR3 disappeared  
151 after 10 min in the presence of sst in a similar fashion for both WT and cK0 variants (**Figure**  
152 **2C**). Concurrently, the WT and cK0 variants appeared in cytoplasmic foci corresponding to  
153 endocytic vesicles (**Figure 2C**). Counting cytoplasmic foci revealed that endocytosis proceeded  
154 normally irrespective of the ubiquitination competence of SSTR3 (**Figure 2D**). SSTR3 thus  
155 behaves similarly to nearly every GPCR tested to date, in that it does not require ubiquitination  
156 for its signal-dependent internalization. Indeed, while ubiquitination of plasma membrane  
157 proteins is a major driver of internalization in yeast, ubiquitination of signaling receptors is  
158 generally dispensable for signal-dependent internalization in mammalian cells (Dores and Trejo,  
159 2019; Piper et al., 2014; Skieterska et al., 2017).

160 These results strongly support a direct role for GPCR ubiquitination in promoting signal-  
161 dependent exit from cilia.

162

### 163 **Ciliary K63 ubiquitin linkages are required for GPCR exit**

164 We next sought to characterize the type of ubiquitin conjugates that are attached to ciliary  
165 proteins. The FK1 and FK2 antibodies used in our immunofluorescent studies recognize



166 ubiquitin either as single adduct or in chain but not free ubiquitin (Fujimuro et al., 1994;  
167 Emmerich and Cohen, 2015). The availability of antibodies specific for K48 and K63 ubiquitin  
168 linkages (Newton et al., 2008) enabled us to determine the types of ubiquitin conjugates that are  
169 attached to ciliary GPCRs. While we found no detectable signal for K48-linked ubiquitin chains  
170 (UbK48) in cilia, the signal for K63-linked ubiquitin (UbK63) linkages mirrored the ciliary  
171 response observed with the FK1 and FK2 antibody in IMCD3-[SSTR3] cells subjected to  
172 agonist treatment (**Figure 3A-B and S1C-D**). Given the high specificity and selectivity of the  
173 K48 and K63 linkage antibodies, these data strongly suggest that K63Ub chains are added onto  
174 SSTR3 inside cilia upon activation.

175 To confirm that K63 of Ub is the main linkage used for the elongation of Ub chains on SSTR3,  
176 we transfected variants of ubiquitin with lysines mutated to arginines into *Arl6<sup>-/-</sup>* cells stably  
177 expressing SSTR3. Signal-dependent ubiquitination of SSTR3 was abrogated when all seven  
178 lysines of Ub were mutated to arginines (**Figure 3C-D**). However, when K63 was the only lysine  
179 left intact on Ub, signal-dependent ubiquitination of SSTR3 was restored to the same extent as  
180 with WT Ub (**Figure 3C-D**). We conclude that UbK63 chains are assembled onto SSTR3 in  
181 response to SSTR3 activation inside cilia.

182 To determine the functional importance of UbK63 linkages in tagging GPCRs for exit from cilia,  
183 we sought to specifically interfere with UbK63 linkages inside cilia (**Figure 4A**). Structural and  
184 biochemical studies have demonstrated that the deubiquitinase AMSH possesses a near-absolute  
185 specificity for UbK63 linkages and does not cleave other Ub chain linkages or Ub-substrates  
186 linkages (Sato et al., 2008; McCullough et al., 2004). AMSH normally function on the surface of  
187 late endosomes in concert with the endosomal sorting complex required for transport (ESCRT)  
188 protein STAM (McCullough et al., 2006). AMSH was previously fused to the epidermal growth  
189 factor receptor EGFR to demonstrate that UbK63 chains assembled on EGFR are dispensable  
190 for internalization but required for sorting into lysosomes (Huang et al., 2013). We targeted  
191 AMSH to cilia using the well-validated ciliary targeting signal from the ciliopathy protein  
192 NPHP3 (Nakata et al., 2012; Wright et al., 2011) and analyzed the exit of three distinct GPCRs:  
193 SMO, GPR161 and SSTR3. To alleviate concerns related to the interaction of AMSH with the

194 STAM, we deleted the STAM-interacting domain of AMSH and only expressed the catalytic  
195 domain of AMSH. The signal-dependent exit of SSTR3 was assessed by treating IMCD3-  
196 [SSTR3] cells with sst for 2h. In cells expressing cilia-AMSH (a fusion of NPHP3[1-200] to GFP  
197 and the catalytic domain of AMSH), sst no longer triggered a significant reduction in the ciliary  
198 levels of SSTR3 (**Figure 4B-C**). Care was taken to only analyze cells that expressed modest  
199 levels of cilia-AMSH as judged by GFP fluorescence (**Figure S3**). In contrast, SSTR3 exit  
200 proceeded normally in cells that expressed NPHP3[1-200]-GFP alone or a catalytically dead  
201 variant of cilia-AMSH that we named cilia-AMSH<sup>†</sup> (**Figure 4B-C**). **These controls strongly**  
202 **suggest that cilia-AMSH exerts its effects on SSTR3 exit by cleaving UbK63 chains inside cilia, a**  
203 **conclusion borne out by imaging ciliary UbK63 in cells transfected with cilia-AMSH (Figure**  
204 **S4).** Similarly, the exit of endogenous GPR161 from RPE cell cilia upon activation of the  
205 Hedgehog pathway was abolished in cells expressing moderate levels of cilia-AMSH (**Figure**  
206 **4D-E**). Neither NPHP3[1-200]-GFP nor cilia-AMSH<sup>†</sup> blocked the signal-dependent exit of  
207 GPR161 from cilia (**Figure 4D-E**).

208 Unlike GPR161 and other ciliary GPCRs such as the Somatostatin receptor 3 (SSTR3) that are  
209 removed from cilia by the BBSome only when they become activated, SMO undergoes  
210 constitutive BBSome-dependent exit from cilia in the absence of Hedgehog pathway stimulation  
211 (Nachury, 2018; Ye et al., 2018; Ocbina and Anderson, 2008; Zhang et al., 2011). Signal-  
212 dependent accumulation of SMO in cilia is achieved, at least in part, by suppression of its exit  
213 (Milenkovic et al., 2015; Nachury and Mick, 2019; Ye et al., 2018). In cells expressing cilia-  
214 AMSH, endogenous SMO spontaneously accumulated inside cilia in the absence of Hedgehog  
215 pathway activation (**Figure 4F-G**). Again, neither NPHP3[1-200]-GFP nor cilia-AMSH<sup>†</sup>  
216 influenced the ciliary accumulation of SMO (**Figure 4F-G**).

217 Together, these results indicate that K63-linked ubiquitin chains inside cilia, presumably built  
218 onto each ciliary GPCRs under a specific signaling stimulus, are required for GPCR removal  
219 from cilia.

220

221  **$\beta$ -arrestin 2 mediates signal-dependent ubiquitination of ciliary GPCRs**

222 As  $\beta$ -arrestin 2 is required for signal-dependent exit of GPR161 and SSTR3 from cilia (Green et  
223 al., 2015; Pal et al., 2016; Ye et al., 2018), we sought to determine the functional relationship  
224 between  $\beta$ -arrestin 2 and the BBSome. As previously described (Green et al., 2015),  $\beta$ -arrestin 2  
225 is initially undetectable inside cilia and becomes recruited to cilia within minutes of SSTR3  
226 agonist addition (**Figure 5A-C**). The ciliary  $\beta$ -arrestin 2 signal reaches a plateau after about 10  
227 min and the  $t_{1/2}$  for ciliary accumulation is less than 5 min (**Figure 5C**). Meanwhile the  $t_{1/2}$  for  
228 BBSome recruitment to the tip of cilia was 10 min and the first signs of detectable SSTR3 exit  
229 were seen between 10 and 15 min (**Figure 5C**). These kinetics suggested that  $\beta$ -arrestin 2 is first  
230 recruited to activated ciliary SSTR3 before the BBSome ferries activated SSTR3 out of cilia.  
231 When ARL6 was depleted, the basal levels of ciliary  $\beta$ -arrestin 2 were elevated but the kinetics of  
232  $\beta$ -arrestin 2 accumulation in cilia upon SSTR3 activation were indistinguishable from control-  
233 depleted cells (**Figure 5A-B**). These data suggest that a small fraction of SSTR3 that is tonically  
234 active fails to exit cilia in ARL6-depleted cells and recruits  $\beta$ -arrestin 2. From these data, we  
235 conclude that  $\beta$ -arrestin 2 functions either upstream of, or in parallel with the BBSome in signal-  
236 dependent retrieval of GPCRs. Similarly, the kinetics of GPR161 exit and  $\beta$ -arrestin 2 ciliary  
237 recruitment upon activation of the Hh pathway indicated that  $\beta$ -arrestin 2 reaches its maximal  
238 ciliary level before the first signs of GPR161 exit become evident (**Figure 5D**).

239 We previously proposed that  $\beta$ -arrestin 2 may bridge activated GPCRs to the BBSome (Ye et al.,  
240 2018; Nachury, 2018). Yet, we have thus far failed to detect a biochemical interaction between  $\beta$ -  
241 arrestin 2 and the BBSome. Furthermore, the continuous distribution patterns of  $\beta$ -arrestin 2 and  
242 SSTR3 inside cilia are similar to one another and distinct from the discontinuous pattern of the  
243 BBSome (**Figure 5A**), arguing against a direct association of  $\beta$ -arrestin 2 with BBSome/IFT  
244 trains inside cilia. We considered the alternative hypothesis that  $\beta$ -arrestin 2 function upstream of  
245 the BBSome. Given that  $\beta$ -arrestin 2 functions in the signal-dependent targeting of GPCRs from  
246 the plasma membrane to the lysosome by recruiting ubiquitin ligases to activated GPCRs (Henry  
247 et al., 2012; Bhandari et al., 2007; Shenoy et al., 2008; Martin et al., 2003), we posited that  $\beta$ -  
248 arrestin 2 recognizes activated GPCRs inside cilia to direct their ubiquitination and subsequent

249 selection by the BBSome for removal from cilia. A central prediction of this model is that  $\beta$ -  
250 arrestin 2 is required for the ubiquitination of ciliary GPCRs in response to stimulation. To test  
251 this prediction, we deleted the  $\beta$ -arrestin 2 gene *Arrb2* in *Arl6* knockout IMCD3 cells (Nager et  
252 al., 2017). While the signal-dependent exit of SSTR3 from cilia failed in both *Arl6*<sup>-/-</sup> and *Arl6*<sup>-/-</sup>  
253 *Arrb2*<sup>-/-</sup> cells (**Figures 1A-B and 6A-B**), ubiquitin staining in cilia and by inference signal-  
254 dependent ubiquitination of SSTR3 was only observed in *Arl6*<sup>-/-</sup> cells (**Figures 6A-B**). In *Arl6*<sup>-/-</sup>  
255 *Arrb2*<sup>-/-</sup> cells, the signal-dependent increase in ciliary ubiquitin signal was no longer observed  
256 (**Figures 6A-B**). Similarly, the increase in ciliary ubiquitin signal seen in *Arl6*<sup>-/-</sup> cells treated with  
257 the Hedgehog pathway agonist SAG was no longer observed in the absence of  $\beta$ -arrestin 2  
258 (**Figure 6C-D**). These data indicate that, in the absence of BBSome function, ciliary GPCRs  
259 become ubiquitinated in response to activation in a  $\beta$ -arrestin 2-dependent manner. We sought  
260 to confirm our imaging-based finding with a biochemical analysis of SSTR3 ubiquitination.  
261 While SSTR3 ubiquitination was readily detected in *Arl6*<sup>-/-</sup> cells and measurably increased upon  
262 stimulation with sst, the deletion of  $\beta$ -arrestin 2 in *Arl6*<sup>-/-</sup> cells drastically reduced SSTR3  
263 ubiquitination levels and no sst-dependent increase of SSTR3 ubiquitination was detected in  
264 *Arl6*<sup>-/-</sup>/*Arrb2*<sup>-/-</sup> cells (**Figure 6E-F**).

265 Together, these data suggest the following order of action: GPCR activation,  $\beta$ -arrestin 2  
266 engagement, Ub ligase recruitment, assembly of K63Ub chains on the GPCR, and finally  
267 selection of ubiquitinated GPCRs for BBSome-mediated retrieval (**Figure 7E**).

268

### 269 **Constitutively retrieved BBSome cargoes are ubiquitinated prior to exit**

270 Besides removing GPCRs from cilia in a regulated fashion, the BBSome also clears cilia of  
271 unwanted proteins that accidentally enter cilia. In the single-cell flagellated organism  
272 *Chlamydomonas reinhardtii*, mutations in the BBSome subunit Bbs4 cause a constitutive  
273 accumulation of several proteins including Phospholipase D in cilia (Lechtreck et al., 2009).  
274 When stained for ubiquitin, *Bbs4 Chlamydomonas* showed a 2-fold enrichment in ciliary signal  
275 compared to WT (**Fig. 7A-B**). Isolation of cilia revealed the accumulation of ubiquitin

276 conjugates above 80 kDa in *Bbs4* mutant *Chlamydomonas* cilia (**Fig. 7C**). These results are  
277 consistent with the hypothesis that ciliary proteins subject to constitutive retrieval are  
278 ubiquitinated prior to their removal from cilia by the BBSome.

279 In the mammalian retina, proteomics studies have found over 100 proteins accumulating in the  
280 outer segment (the equivalent of the cilium) of *Bbs* photoreceptors compared to WT  
281 photoreceptors (Datta et al., 2015). When we stained sections of mouse retina for ubiquitin, we  
282 found a drastic accumulation of ubiquitin signal in the outer segment of *Bbs4*<sup>-/-</sup> photoreceptors  
283 compared to WT photoreceptors (**Fig. 7D**). We note that the nature of ubiquitin conjugates  
284 remains to be determined in the case of constitutive cargoes. These results suggest that a variety  
285 of proteins that accidentally flow into the photoreceptors outer segments –possibly caught on the  
286 tremendous flux of rhodopsin trafficking to the outer segment (Baker et al., 2008)– are recognized  
287 as foreign to the cilium, ubiquitinated on site and selected for removal by the BBSome (**Figure**  
288 **7E**).

## 289 **DISCUSSION**

### 290 **Recognition of K63-linked ubiquitin chains by the ciliary exit machinery**

291 Our results indicate that K63-linked ubiquitin chains tag activated GPCRs and likely other  
292 unwanted proteins for BBSome-mediated removal from cilia. Prior findings in trypanosomes  
293 suggest that the BBSome may directly recognize ubiquitin (Langousis et al., 2016), although  
294 direct biochemical evidence and information regarding ubiquitin chain specificity is still missing.  
295 It is also known that the BBSome directly recognizes cytoplasmic determinants in the GPCRs it  
296 ferries out of cilia (Jin et al., 2010; Klink et al., 2017; Ye et al., 2018; Seo et al., 2011; Domire et  
297 al., 2011). We propose that the summation of weak molecular interactions between the BBSome  
298 and UbK63 chains on one hand and the BBSome and GPCRs cytoplasmic loops on the other  
299 hand increases the BBSome-cargo interaction to enable sorting of ubiquitinated GPCRs out of  
300 cilia. In support of this bivalent recognition of ubiquitinated cargoes by the BBSome, the affinity  
301 of the BBSome for cytoplasmic determinant of GPCRs are in the  $\mu\text{M}$  range (Klink et al., 2017)  
302 and affinities of ubiquitin-binding proteins for ubiquitin typically reside in the sub mM range  
303 (Husnjak and Dikic, 2012). The nature of the biochemical entity that directly recognizes  
304 ubiquitin, and in particular UbK63 chains remains to be determined: while the BBSome was  
305 pulled down on Ub-agarose resin from trypanosome lysates (Langousis et al., 2016), no known  
306 Ub-binding domain is found in the BBSome polypeptides. Furthermore, the IFT-A subunit IFT-  
307 139 associates with ubiquitinated  $\alpha$ -tubulin in ciliary extracts from *Chlamydomonas*, suggesting a  
308 possible recognition of ubiquitin by IFT139 (Wang et al., 2019). Again, the absence of known  
309 Ub-binding domain in the sequence of IFT139 presents a challenge to this hypothesis.

310

### 311 **Requirements for K63-linked ubiquitination in ciliary exit and sorting to the** 312 **lysosome**

313 Wang et al. (2019) found that  $\alpha$ -tubulin is modified by UbK63 chains and not UbK48 chain  
314 upon ciliary disassembly. The ubiquitin ligases that have been associated with ciliary clearance of  
315 Patched 1 and of PDGFR $\alpha$  specifically assemble UbK63 chains (Kim et al., 2015; Yue et al.,

316 2014; Schmid et al., 2018). The suppression of GPR161, SSTR3 and SMO exit by cilia-AMSH  
317 (**Figure 4**) demonstrates that UbK63 chains are recognized inside cilia to direct trafficking out of  
318 cilia. The milder exit defect observed when acceptor lysines are mutated on ciliary GPCRs  
319 (**Figure 2**) than when cilia-AMSH is expressed (**Figure 4**) suggests that K63Ub chains added  
320 onto other ciliary proteins besides GPCRs may participate in ciliary exit. A role for  
321 ubiquitination of the ciliary transport machinery in exit is in line with the functional importance  
322 of ubiquitination of the endolysosomal machinery in GPCR trafficking (Dores and Trejo, 2019).  
323  $\beta$  arrestin ubiquitination promotes internalization of the  $\beta_2$ -adrenergic receptor ( $\beta_2$ AR) (Shenoy  
324 et al., 2001, 2007; Shenoy and Lefkowitz, 2003), ubiquitination of the ESCRT components Hrs  
325 and STAM participates in sorting of the chemokine receptor CXCR4 into the MVB (Malik and  
326 Marchese, 2010; Marchese et al., 2003) and ubiquitination of the ESCRT-III recruitment factor  
327 ALIX enhances MVB sorting of the protease activated receptor PAR-1 (Dores et al., 2015).

328 The requirement for UbK63 chains in signal-dependent exit from the cilium contrasts with the  
329 more limited role of ubiquitin and UbK63 chains in signal-dependent endocytosis of signaling  
330 receptors at the plasma membrane in mammals. Although ubiquitination is a major driver of  
331 endocytosis in yeast (Stringer and Piper, 2011; Piper et al., 2014), foundational studies on  
332 epidermal growth factor receptor (EGFR) trafficking found that signal-dependent receptor  
333 ubiquitination is not essential for internalization because it is redundant with other  
334 internalization mechanisms (Goh et al., 2010; Huang et al., 2013; Fortian et al., 2015). Studies of  
335 an EGFR-AMSH fusion found that UbK63 chains attached onto EGFR become increasingly  
336 necessary as EGFR progresses along the degradative route and a strict requirement for K63-  
337 linked ubiquitin chains is observed at the terminal step of EGFR sorting into the lumen of  
338 multivesicular body (MVB) (Huang et al., 2013). A strict requirement for receptor ubiquitination  
339 in degradative sorting but not in internalization can be generalized to nearly all GPCRs  
340 (Skieterska et al., 2017), namely  $\beta_2$ AR (Shenoy et al., 2001), CXCR4 (Marchese and Benovic,  
341 2001),  $\mu$  opioid receptor (Hislop et al., 2011),  $\kappa$  opioid receptor (Li et al., 2008),  $\delta$  opioid receptor  
342 (Henry et al., 2011), neurokinin-1 receptor (Cottrell et al., 2006), protease activated receptor 2  
343 (PAR-2) (Jacob et al., 2005) and vasopressin receptor 2 (V2R) (Martin et al., 2003). Similarly, we

344 find that SSTR3 endocytosis proceeds normally in the absence of SSTR3 ubiquitination (**Figure**  
345 **2C-D**). Studying the importance of ubiquitin K63 in mammalian cells via genetics remains  
346 challenging because of the multiple genes encoding Ub but in yeast strains expressing UbK63R  
347 as the sole source of Ub, the Gap1 permease is internalized normally and fails to get sorted into  
348 the MVB (Lauwers et al., 2009).

349 The parallels between sorting at the late endosome and ciliary trafficking extend to  $\beta$  arrestin-  
350 directed ubiquitination. While  $\beta$  arrestin functions inside cilia to direct the addition of ubiquitin  
351 onto activated SSTR3 and GPR161 (**Figures 5 and 6**),  $\beta$  arrestin-mediated ubiquitination  
352 selectively affects sorting at the level of endosomes rather than at the plasma membrane for  
353 activated CXCR4 (Bhandari et al., 2007),  $\beta_2$ AR (Shenoy et al., 2008) and V2R (Martin et al.,  
354 2003) and  $\beta$  arrestin-mediated ubiquitination of CXCR4 was shown to take place on endosomes  
355 (Malik and Marchese, 2010). In this context, the recognition of K63-linked ubiquitin chain inside  
356 cilia may benefit the endosomal origin of primary cilia (Sorokin, 1962; Westlake et al., 2011;  
357 Mitchell, 2017).

358 The parallels between endosomal and ciliary trafficking lead us to speculate that some  
359 ubiquitinated proteins might be accidentally sorted to cilia instead of late endosomes. These  
360 proteins would then need to be retrieved from cilia by the BBSome. Thus, the Ub signal detected  
361 in photoreceptor outer segment and in *Chlamydomonas* flagella might result from the accidental  
362 import of ubiquitinated proteins into cilia rather than *in situ* ubiquitination of unwanted proteins  
363 inside cilia.

364

### 365 **Potential coupling between BBSome-mediated exit and degradative sorting**

366 An interesting consideration is the relationship between ciliary exit and endo-lysosomal sorting. It  
367 has been proposed that endocytosis of signaling receptors is intimately coupled to their exit from  
368 cilia (Pedersen et al., 2016). However, single molecule imaging of GPR161 exiting cilia suggests  
369 that activated GPR161 diffuses into the plasma membrane after it exits from the ciliary  
370 compartment (Ye et al., 2018). **Prior findings that worm mutants for BBSome or the ESCRT**



371 machinery both fail to remove ciliary proteins fused to Ub from cilia (Hu et al., 2007; Xu et al.,  
372 2015) suggest the provocative possibility that ciliary exit may be tightly coupled to degradative  
373 sorting. Nonetheless, the hypothesis that interfering with UbK63 chain formation on ciliary  
374 GPCRs indirectly blocks ciliary exit because of a primary defect in endocytosis can be rejected  
375 because ubiquitination is not a major determinant of SSTR3 endocytosis and because cilia-  
376 AMSH potently and specifically blocks the signal-dependent exit of ciliary GPCRs.

377 In this context, the contrast between the dramatic increase in ubiquitinated SSTR3 levels in *Arl6*  
378 <sup>-/-</sup> cells compared to WT cells even in the absence of stimulation (**Figure 1C-D**) and the modest  
379 increase in ciliary Ub levels in *Arl6*<sup>-/-</sup> cells compared to WT cells in the absence of stimulation  
380 (**Figure 1A-B**) suggests that a considerable amount of ubiquitinated SSTR3 accumulates outside  
381 of cilia in *Arl6*<sup>-/-</sup> cells. One interpretation consistent with a direct coupling between ciliary exit  
382 and degradation is that a small fraction of ubiquitinated SSTR3 escapes cilia in *Arl6*<sup>-/-</sup> cells but  
383 fails to reach to correct degradative route. In this interpretation, the BBSome would deliver its  
384 cargoes to the ESCRT machinery for routing into the lysosomal degradative pathway.

385

### 386 **Ubiquitination and control of the ciliary proteome**

387 A role for ubiquitination in selecting unwanted proteins for removal from cilia may unify the  
388 functions of the BBSome in signal-dependent retrieval of GPCRs and the constitutive clearance  
389 of proteins that accidentally enter cilia. In both of these cases, unwanted ciliary proteins need to  
390 be recognized as ‘non-self’ by a ciliary surveillance machinery. For GPCRs,  $\beta$  arrestin orchestrate  
391 the recognition of activated GPCRs as unwanted by directing their ubiquitination. A fascinating  
392 question for future investigations is how the more than 100 proteins that accumulate in outer  
393 segments of *Bbs* photoreceptors are recognized as ‘non-self’ and tagged with ubiquitin.

394

395 **REFERENCES**

- 396 Anvarian, Z., K. Mykytyn, S. Mukhopadhyay, L.B. Pedersen, and S.T. Christensen. 2019.  
397 Cellular signalling by primary cilia in development, organ function and disease. *Nat. Rev.*  
398 *Nephrol.* doi:10.1038/s41581-019-0116-9.
- 399 Baker, S.A., M. Haeri, P. Yoo, S.M. Gospe, N.P. Skiba, B.E. Knox, and V.Y. Arshavsky. 2008.  
400 The outer segment serves as a default destination for the trafficking of membrane proteins  
401 in photoreceptors. *J. Cell Biol.* 183:485–498. doi:10.1083/jcb.200806009.
- 402 Bhandari, D., J. Trejo, J.L. Benovic, and A. Marchese. 2007. Arrestin-2 interacts with the  
403 ubiquitin-protein isopeptide ligase atrophin-interacting protein 4 and mediates  
404 endosomal sorting of the chemokine receptor CXCR4. *J. Biol. Chem.* 282:36971–36979.  
405 doi:10.1074/jbc.M705085200.
- 406 Chiang, A.P., J.S. Beck, H. Yen, M.K. Tayeh, T.E. Scheetz, R.E. Swiderski, D.Y. Nishimura,  
407 T.A. Braun, K.-Y.A. Kim, J. Huang, K. Elbedour, R. Carmi, D.C. Slusarski, T.L.  
408 Casavant, E.M. Stone, and V.C. Sheffield. 2006. Homozygosity mapping with SNP  
409 arrays identifies TRIM32, an E3 ubiquitin ligase, as a Bardet-Biedl syndrome gene  
410 (BBS11). *Proc. Natl. Acad. Sci. U. S. A.* 103:6287–6292. doi:10.1073/pnas.0600158103.
- 411 Corbit, K.C., P. Aanstad, V. Singla, A.R. Norman, D.Y.R. Stainier, and J.F. Reiter. 2005.  
412 Vertebrate Smoothed functions at the primary cilium. *Nature.* 437:1018–1021.  
413 doi:10.1038/nature04117.
- 414 Cottrell, G.S., B. Padilla, S. Pikiros, D. Roosterman, M. Steinhoff, D. Gehring, E.F. Grady, and  
415 N.W. Bunnett. 2006. Ubiquitin-dependent Down-regulation of the Neurokinin-1  
416 Receptor. *J. Biol. Chem.* 281:27773–27783. doi:10.1074/jbc.M603369200.
- 417 Craige, B., J.M. Brown, and G.B. Witman. 2013. Isolation of Chlamydomonas Flagella. *Curr.*  
418 *Protoc. Cell Biol.* 59:3.41.1-3.41.9. doi:10.1002/0471143030.cb0341s59.
- 419 Datta, P., C. Allamargot, J.S. Hudson, E.K. Andersen, S. Bhattarai, A.V. Drack, V.C. Sheffield,  
420 and S. Seo. 2015. Accumulation of non-outer segment proteins in the outer segment  
421 underlies photoreceptor degeneration in Bardet-Biedl syndrome. *Proc Natl Acad Sci U A.*  
422 112:E4400–9. doi:10.1073/pnas.1510111112.
- 423 Domire, J.S., J.A. Green, K.G. Lee, A.D. Johnson, C.C. Askwith, and K. Mykytyn. 2011.  
424 Dopamine receptor 1 localizes to neuronal cilia in a dynamic process that requires the  
425 Bardet-Biedl syndrome proteins. *Cell. Mol. Life Sci. CMLS.* 68:2951–2960.  
426 doi:10.1007/s00018-010-0603-4.

- 427 Dores, M.R., H. Lin, N. J Grimsey, F. Mendez, and J. Trejo. 2015. The  $\alpha$ -arrestin ARRDC3  
428 mediates ALIX ubiquitination and G protein-coupled receptor lysosomal sorting. *Mol.*  
429 *Biol. Cell.* 26:4660–4673. doi:10.1091/mbc.E15-05-0284.
- 430 Dores, M.R., and J. Trejo. 2019. Endo-lysosomal sorting of G-protein-coupled receptors by  
431 ubiquitin: Diverse pathways for G-protein-coupled receptor destruction and beyond.  
432 *Traffic Cph. Den.* 20:101–109. doi:10.1111/tra.12619.
- 433 Emmerich, C.H., and P. Cohen. 2015. Optimising methods for the preservation, capture and  
434 identification of ubiquitin chains and ubiquitylated proteins by immunoblotting. *Biochem.*  
435 *Biophys. Res. Commun.* 466:1–14. doi:10.1016/j.bbrc.2015.08.109.
- 436 Fortian, A., L.K. Dionne, S.H. Hong, W. Kim, S.P. Gygi, S.C. Watkins, and A. Sorkin. 2015.  
437 Endocytosis of Ubiquitylation-Deficient EGFR Mutants via Clathrin-Coated Pits is  
438 Mediated by Ubiquitylation. *Traffic Cph. Den.* 16:1137–1154. doi:10.1111/tra.12314.
- 439 Fujimuro, M., H. Sawada, and H. Yokosawa. 1994. Production and characterization of  
440 monoclonal antibodies specific to multi-ubiquitin chains of polyubiquitinated proteins.  
441 *FEBS Lett.* 349:173–180. doi:10.1016/0014-5793(94)00647-4.
- 442 Gigante, E.D., and T. Caspary. 2020. Signaling in the primary cilium through the lens of the  
443 Hedgehog pathway. *Wiley Interdiscip. Rev. Dev. Biol.* e377. doi:10.1002/wdev.377.
- 444 Goh, L.K., F. Huang, W. Kim, S. Gygi, and A. Sorkin. 2010. Multiple mechanisms collectively  
445 regulate clathrin-mediated endocytosis of the epidermal growth factor receptor. *J. Cell*  
446 *Biol.* 189:871–883. doi:10.1083/jcb.201001008.
- 447 Gorman, D.S., and R.P. Levine. 1965. Cytochrome f and plastocyanin: their sequence in the  
448 photosynthetic electron transport chain of *Chlamydomonas reinhardi*. *Proc. Natl. Acad. Sci.*  
449 *U. S. A.* 54:1665–1669. doi:10.1073/pnas.54.6.1665.
- 450 Green, J.A., C.L. Schmid, E. Bley, P.C. Monsma, A. Brown, L.M. Bohn, and K. Mykytyn. 2015.  
451 Recruitment of  $\beta$ -Arrestin into Neuronal Cilia Modulates Somatostatin Receptor  
452 Subtype 3 Ciliary Localization. *Mol. Cell. Biol.* 36:223–235. doi:10.1128/MCB.00765-15.
- 453 Haglund, K., S. Sigismund, S. Polo, I. Szymkiewicz, P.P. Di Fiore, and I. Dikic. 2003. Multiple  
454 monoubiquitination of RTKs is sufficient for their endocytosis and degradation. *Nat. Cell*  
455 *Biol.* 5:461–466. doi:10.1038/ncb983.
- 456 Henry, A.G., J.N. Hislop, J. Grove, K. Thorn, M. Marsh, and M. von Zastrow. 2012.  
457 Regulation of endocytic clathrin dynamics by cargo ubiquitination. *Dev. Cell.* 23:519–532.  
458 doi:10.1016/j.devcel.2012.08.003.

- 459 Henry, A.G., I.J. White, M. Marsh, M. von Zastrow, and J.N. Hislop. 2011. The Role of  
460 Ubiquitination in Lysosomal Trafficking of  $\delta$ -Opioid Receptors. *Traffic*. 12:170–184.  
461 doi:10.1111/j.1600-0854.2010.01145.x.
- 462 Hislop, J.N., A.G. Henry, and M. von Zastrow. 2011. Ubiquitination in the first cytoplasmic loop  
463 of  $\mu$ -opioid receptors reveals a hierarchical mechanism of lysosomal down-regulation. *J.*  
464 *Biol. Chem.* 286:40193–40204. doi:10.1074/jbc.M111.288555.
- 465 Howarth, M., and A.Y. Ting. 2008. Imaging proteins in live mammalian cells with biotin ligase  
466 and monovalent streptavidin. *Nat. Protoc.* 3:534–545. doi:10.1038/nprot.2008.20.
- 467 Hu, J., S.G. Wittekind, and M.M. Barr. 2007. STAM and Hrs down-regulate ciliary TRP  
468 receptors. *Mol. Biol. Cell*. 18:3277–3289. doi:10.1091/mbc.E07-03-0239.
- 469 Huang, F., X. Zeng, W. Kim, M. Balasubramani, A. Fortian, S.P. Gygi, N.A. Yates, and A.  
470 Sorkin. 2013. Lysine 63-linked polyubiquitination is required for EGF receptor  
471 degradation. *Proc. Natl. Acad. Sci.* 110:15722–15727. doi:10.1073/pnas.1308014110.
- 472 Huang, K., D.R. Diener, and J.L. Rosenbaum. 2009. The ubiquitin conjugation system is  
473 involved in the disassembly of cilia and flagella. *J. Cell Biol.* 186:601–613.  
474 doi:10.1083/jcb.200903066.
- 475 Husnjak, K., and I. Dikic. 2012. Ubiquitin-binding proteins: decoders of ubiquitin-mediated  
476 cellular functions. *Annu. Rev. Biochem.* 81:291–322. doi:10.1146/annurev-biochem-  
477 051810-094654.
- 478 Jacob, C., G.S. Cottrell, D. Gehringer, F. Schmidlin, E.F. Grady, and N.W. Bunnett. 2005. c-  
479 Cbl mediates ubiquitination, degradation, and down-regulation of human protease-  
480 activated receptor 2. *J. Biol. Chem.* 280:16076–16087. doi:10.1074/jbc.M500109200.
- 481 Jiang, W., X. Yao, Z. Shan, W. Li, Y. Gao, and Q. Zhang. 2019. E3 ligase Herc4 regulates  
482 Hedgehog signalling through promoting Smoothed degradation. *J. Mol. Cell Biol.*  
483 11:791–803. doi:10.1093/jmcb/mjz024.
- 484 Jin, H., S.R. White, T. Shida, S. Schulz, M. Aguiar, S.P. Gygi, J.F. Bazan, and M.V. Nachury.  
485 2010. The conserved Bardet-Biedl syndrome proteins assemble a coat that traffics  
486 membrane proteins to cilia. *Cell*. 141:1208–1219. doi:10.1016/j.cell.2010.05.015.
- 487 Kim, J., E.Y. C Hsia, A. Brigui, A. Plessis, P.A. Beachy, and X. Zheng. 2015. The role of ciliary  
488 trafficking in Hedgehog receptor signaling. *Sci. Signal.* 8:ra55–ra55.  
489 doi:10.1126/scisignal.aaa5622.

- 490 Klink, B.U., E. Zent, P. Juneja, A. Kuhlee, S. Raunser, and A. Wittinghofer. 2017. A  
491 recombinant BBSome core complex and how it interacts with ciliary cargo. *eLife*. 6.  
492 doi:10.7554/eLife.27434.
- 493 Langousis, G., M.M. Shimogawa, E.A. Saada, A.A. Vashisht, R. Spreafico, A.R. Nager, W.D.  
494 Barshop, M.V. Nachury, J.A. Wohlschlegel, and K.L. Hill. 2016. Loss of the BBSome  
495 perturbs endocytic trafficking and disrupts virulence of *Trypanosoma brucei*. *Proc Natl*  
496 *Acad Sci U A*. 113:632–637. doi:10.1073/pnas.1518079113.
- 497 Lauwers, E., C. Jacob, and B. André. 2009. K63-linked ubiquitin chains as a specific signal for  
498 protein sorting into the multivesicular body pathway. *J. Cell Biol.* 185:493–502.  
499 doi:10.1083/jcb.200810114.
- 500 Lechtreck, K.-F., E.C. Johnson, T. Sakai, D. Cochran, B.A. Ballif, J. Rush, G.J. Pazour, M.  
501 Ikebe, and G.B. Witman. 2009. The *Chlamydomonas reinhardtii* BBSome is an IFT  
502 cargo required for export of specific signaling proteins from flagella. *J. Cell Biol.*  
503 187:1117–1132. doi:10.1083/jcb.200909183.
- 504 Li, J.-G., D.S. Haines, and L.-Y. Liu-Chen. 2008. Agonist-Promoted Lys63-Linked  
505 Polyubiquitination of the Human  $\kappa$ -Opioid Receptor Is Involved in Receptor Down-  
506 Regulation. *Mol. Pharmacol.* 73:1319–1330. doi:10.1124/mol.107.042846.
- 507 Liew, G.M., F. Ye, A.R. Nager, J.P. Murphy, J.S. Lee, M. Aguiar, D. Breslow, S.P. Gygi, and  
508 M.V. Nachury. 2014. The intraflagellar transport protein IFT27 promotes BBSome exit  
509 from cilia through the GTPase ARL6/BBS3. *Dev. Cell.* 31:265–278.  
510 doi:10.1016/j.devcel.2014.09.004.
- 511 Loktev, A.V., and P.K. Jackson. 2013. Neuropeptide Y family receptors traffic via the Bardet-  
512 Biedl syndrome pathway to signal in neuronal primary cilia. *Cell Rep.* 5:1316–1329.  
513 doi:10.1016/j.celrep.2013.11.011.
- 514 Malik, R., and A. Marchese. 2010. Arrestin-2 interacts with the endosomal sorting complex  
515 required for transport machinery to modulate endosomal sorting of CXCR4. *Mol. Biol.*  
516 *Cell.* 21:2529–2541. doi:10.1091/mbc.e10-02-0169.
- 517 Marchese, A., and J.L. Benovic. 2001. Agonist-promoted ubiquitination of the G protein-coupled  
518 receptor CXCR4 mediates lysosomal sorting. *J. Biol. Chem.* 276:45509–45512.  
519 doi:10.1074/jbc.C100527200.
- 520 Marchese, A., C. Raiborg, F. Santini, J.H. Keen, H. Stenmark, and J.L. Benovic. 2003. The E3  
521 ubiquitin ligase AIP4 mediates ubiquitination and sorting of the G protein-coupled  
522 receptor CXCR4. *Dev. Cell.* 5:709–722. doi:10.1016/s1534-5807(03)00321-6.

- 523 Martin, N.P., R.J. Lefkowitz, and S.K. Shenoy. 2003. Regulation of V2 Vasopressin Receptor  
524 Degradation by Agonist-promoted Ubiquitination. *J. Biol. Chem.* 278:45954–45959.  
525 doi:10.1074/jbc.M308285200.
- 526 McCullough, J., M.J. Clague, and S. Urbé. 2004. AMSH is an endosome-associated ubiquitin  
527 isopeptidase. *J. Cell Biol.* 166:487–492. doi:10.1083/jcb.200401141.
- 528 McCullough, J., P.E. Row, Ó. Lorenzo, M. Doherty, R. Beynon, M.J. Clague, and S. Urbé.  
529 2006. Activation of the Endosome-Associated Ubiquitin Isopeptidase AMSH by STAM,  
530 a Component of the Multivesicular Body-Sorting Machinery. *Curr. Biol.* 16:160–165.  
531 doi:10.1016/j.cub.2005.11.073.
- 532 Michel, M.A., P.R. Elliott, K.N. Swatek, M. Simicek, J.N. Pruneda, J.L. Wagstaff, S.M.V.  
533 Freund, and D. Komander. 2015. Assembly and specific recognition of k29- and k33-  
534 linked polyubiquitin. *Mol. Cell.* 58:95–109. doi:10.1016/j.molcel.2015.01.042.
- 535 Milenkovic, L., L.E. Weiss, J. Yoon, T.L. Roth, Y.S. Su, S.J. Sahl, M.P. Scott, and W.E.  
536 Moerner. 2015. Single-molecule imaging of Hedgehog pathway protein Smoothed in  
537 primary cilia reveals binding events regulated by Patched1. *Proc Natl Acad Sci U S A.*  
538 112:8320–8325. doi:10.1073/pnas.1510094112.
- 539 Mitchell, D.R. 2017. Evolution of Cilia. *Cold Spring Harb. Perspect. Biol.* 9:a028290.  
540 doi:10.1101/cshperspect.a028290.
- 541 Mukhopadhyay, S., X. Wen, N. Ratti, A. Loktev, L. Rangell, S.J. Scales, and P.K. Jackson.  
542 2013. The ciliary G-protein-coupled receptor Gpr161 negatively regulates the Sonic  
543 hedgehog pathway via cAMP signaling. *Cell.* 152:210–223.  
544 doi:10.1016/j.cell.2012.12.026.
- 545 Mykytyn, K., and C. Askwith. 2017. G-Protein-Coupled Receptor Signaling in Cilia. *Cold Spring*  
546 *Harb. Perspect. Biol.* a028183. doi:10.1101/cshperspect.a028183.
- 547 Mykytyn, K., R.F. Mullins, R.F. Mullins, M. Andrews, M. Andrews, A.P. Chiang, A.P. Chiang,  
548 R.E. Swiderski, R.E. Swiderski, B. Yang, B. Yang, T. Braun, T. Braun, T. Casavant, T.  
549 Casavant, E.M. Stone, E.M. Stone, and V.C. Sheffield. 2004. Bardet-Biedl syndrome  
550 type 4 (BBS4)-null mice implicate Bbs4 in flagella formation but not global cilia assembly.  
551 *Proc. Natl. Acad. Sci. U. S. A.* 101:8664–8669. doi:10.1073/pnas.0402354101.
- 552 Nachury, M.V. 2018. The molecular machines that traffic signaling receptors into and out of  
553 cilia. *Curr. Opin. Cell Biol.* 51:124–131. doi:10.1016/j.ceb.2018.03.004.
- 554 Nachury, M.V., and D.U. Mick. 2019. Establishing and regulating the composition of cilia for  
555 signal transduction. *Nat. Rev. Mol. Cell Biol.* 20:389–405. doi:10.1038/s41580-019-0116-4.

- 556 Nager, A.R., J.S. Goldstein, V. Herranz-Pérez, D. Portran, F. Ye, J.M. García-Verdugo, and  
557 M.V. Nachury. 2017. An Actin Network Dispatches Ciliary GPCRs into Extracellular  
558 Vesicles to Modulate Signaling. *Cell*. 168:252–263.e14. doi:10.1016/j.cell.2016.11.036.
- 559 Nakata, K., D. Shiba, D. Kobayashi, and T. Yokoyama. 2012. Targeting of Nphp3 to the  
560 primary cilia is controlled by an N-terminal myristoylation site and coiled-coil domains.  
561 *Cytoskelet. Hoboken Nj*. 69:221–234. doi:10.1002/cm.21014.
- 562 Newton, K., M.L. Matsumoto, I.E. Wertz, D.S. Kirkpatrick, J.R. Lill, J. Tan, D. Dugger, N.  
563 Gordon, S.S. Sidhu, F.A. Fellouse, L. Komuves, D.M. French, R.E. Ferrando, C. Lam,  
564 D. Compaan, C. Yu, I. Bosanac, S.G. Hymowitz, R.F. Kelley, and V.M. Dixit. 2008.  
565 Ubiquitin chain editing revealed by polyubiquitin linkage-specific antibodies. *Cell*.  
566 134:668–678. doi:10.1016/j.cell.2008.07.039.
- 567 Ocbina, P.J.R., and K.V. Anderson. 2008. Intraflagellar transport, cilia, and mammalian  
568 Hedgehog signaling: analysis in mouse embryonic fibroblasts. *Dev. Dyn*. 237:2030–2038.  
569 doi:10.1002/dvdy.21551.
- 570 Pal, K., S. Hwang, B. Somatilaka, H. Badgandi, P.K. Jackson, K. DeFea, and S.  
571 Mukhopadhyay. 2016. Smoothed determines  $\beta$ -arrestin-mediated removal of the G  
572 protein-coupled receptor Gpr161 from the primary cilium. *J. Cell Biol.* 212:861–875.  
573 doi:10.1083/jcb.201506132.
- 574 Pedersen, L.B., J.B. Mogensen, and S.T. Christensen. 2016. Endocytic Control of Cellular  
575 Signaling at the Primary Cilium. *Trends Biochem. Sci.* 41:784–797.  
576 doi:10.1016/j.tibs.2016.06.002.
- 577 Piper, R.C., I. Dikic, and G.L. Lukacs. 2014. Ubiquitin-Dependent Sorting in Endocytosis. *Cold*  
578 *Spring Harb. Perspect. Biol.* 6:a016808–a016808. doi:10.1101/cshperspect.a016808.
- 579 Postma, M., and J. Goedhart. 2019. PlotsOfData-A web app for visualizing data together with  
580 their summaries. *PLoS Biol.* 17:e3000202. doi:10.1371/journal.pbio.3000202.
- 581 Rohatgi, R., L. Milenkovic, and M.P. Scott. 2007. Patched1 regulates hedgehog signaling at the  
582 primary cilium. *Sci. N. Y. NY*. 317:372–376. doi:10.1126/science.1139740.
- 583 Sato, Y., A. Yoshikawa, A. Yamagata, H. Mimura, M. Yamashita, K. Ookata, O. Nureki, K.  
584 Iwai, M. Komada, and S. Fukai. 2008. Structural basis for specific cleavage of Lys 63-  
585 linked polyubiquitin chains. *Nature*. 455:358–362. doi:10.1038/nature07254.
- 586 Schmid, F.M., K.B. Schou, M.J. Vilhelm, M.S. Holm, L. Breslin, P. Farinelli, L.A. Larsen, J.S.  
587 Andersen, L.B. Pedersen, and S.T. Christensen. 2018. IFT20 modulates ciliary PDGFR $\alpha$   
588 signaling by regulating the stability of Cbl E3 ubiquitin ligases. *J. Cell Biol.* 217:151–161.  
589 doi:10.1083/jcb.201611050.

- 590 Seo, S., Q. Zhang, K. Bugge, D. Breslow, C.C. Searby, M.V. Nachury, and V.C. Sheffield.  
591 2011. A novel protein LZTFL1 regulates ciliary trafficking of the BBSome and  
592 Smoothed. *PLoS Genet.* 7:e1002358. doi:10.1371/journal.pgen.1002358.
- 593 Shaner, N.C., G.G. Lambert, A. Chammas, Y. Ni, P.J. Cranfill, M.A. Baird, B.R. Sell, J.R.  
594 Allen, R.N. Day, M. Israelsson, M.W. Davidson, and J. Wang. 2013. A bright  
595 monomeric green fluorescent protein derived from *Branchiostoma lanceolatum*. *Nat.*  
596 *Methods.* 10:407–409. doi:10.1038/nmeth.2413.
- 597 Shankar, H., H. Shankar, A. Michal, A. Michal, R.C. Kern, R.C. Kern, D.S. Kang, D.S. Kang,  
598 V.V. Gurevich, V.V. Gurevich, and J.L. Benovic. 2010. Non-visual arrestins are  
599 constitutively associated with the centrosome and regulate centrosome function. *J. Biol.*  
600 *Chem.* 285:8316–8329. doi:10.1074/jbc.M109.062521.
- 601 Shearer, R.F., and D.N. Saunders. 2016. Regulation of primary cilia formation by the ubiquitin-  
602 proteasome system. *Biochem. Soc. Trans.* 44:1265–1271. doi:10.1042/BST20160174.
- 603 Shenoy, S.K., L.S. Barak, K. Xiao, S. Ahn, M. Berthouze, A.K. Shukla, L.M. Luttrell, and R.J.  
604 Lefkowitz. 2007. Ubiquitination of beta-arrestin links seven-transmembrane receptor  
605 endocytosis and ERK activation. *J. Biol. Chem.* 282:29549–29562.  
606 doi:10.1074/jbc.M700852200.
- 607 Shenoy, S.K., and R.J. Lefkowitz. 2003. Trafficking Patterns of  $\beta$ -Arrestin and G Protein-  
608 coupled Receptors Determined by the Kinetics of  $\beta$ -Arrestin Deubiquitination. *J. Biol.*  
609 *Chem.* 278:14498–14506. doi:10.1074/jbc.M209626200.
- 610 Shenoy, S.K., P.H. McDonald, T.A. Kohout, and R.J. Lefkowitz. 2001. Regulation of receptor  
611 fate by ubiquitination of activated beta 2-adrenergic receptor and beta-arrestin. *Science.*  
612 294:1307–1313. doi:10.1126/science.1063866.
- 613 Shenoy, S.K., K. Xiao, V. Venkataramanan, P.M. Snyder, N.J. Freedman, and A.M. Weissman.  
614 2008. Nedd4 mediates agonist-dependent ubiquitination, lysosomal targeting, and  
615 degradation of the beta2-adrenergic receptor. *J. Biol. Chem.* 283:22166–22176.  
616 doi:10.1074/jbc.M709668200.
- 617 Skieterska, K., P. Rondou, and K. Van Craenenbroeck. 2017. Regulation of G Protein-Coupled  
618 Receptors by Ubiquitination. *Int. J. Mol. Sci.* 18. doi:10.3390/ijms18050923.
- 619 Sorokin, S. 1962. Centrioles and the formation of rudimentary cilia by fibroblasts and smooth  
620 muscle cells. *J. Cell Biol.* 15:363–377. doi:10.1083/jcb.15.2.363.
- 621 Stringer, D.K., and R.C. Piper. 2011. A single ubiquitin is sufficient for cargo protein entry into  
622 MVBs in the absence of ESCRT ubiquitination. *J. Cell Biol.* 192:229–242.  
623 doi:10.1083/jcb.201008121.



- 624 Swatek, K.N., and D. Komander. 2016. Ubiquitin modifications. *Cell Res.* 26:399–422.  
625 doi:10.1038/cr.2016.39.
- 626 Wang, Q., Z. Peng, H. Long, X. Deng, and K. Huang. 2019. Polyubiquitylation of  $\alpha$ -tubulin at  
627 K304 is required for flagellar disassembly in *Chlamydomonas*. *J. Cell Sci.* 132.  
628 doi:10.1242/jcs.229047.
- 629 Westlake, C.J., L.M. Baye, M.V. Nachury, K.J. Wright, K.E. Ervin, L. Phu, C. Chalouni, J.S.  
630 Beck, D.S. Kirkpatrick, D.C. Slusarski, V.C. Sheffield, R.H. Scheller, and P.K. Jackson.  
631 2011. Primary cilia membrane assembly is initiated by Rab11 and transport protein  
632 particle II (TRAPPII) complex-dependent trafficking of Rabin8 to the centrosome. *Proc*  
633 *Natl Acad Sci U A.* 108:2759–2764. doi:10.1073/pnas.1018823108.
- 634 Wingfield, J.L., K.-F. Lechtreck, and E. Lorentzen. 2018. Trafficking of ciliary membrane  
635 proteins by the intraflagellar transport/BBSome machinery. *Essays Biochem.* 62:753–763.  
636 doi:10.1042/EBC20180030.
- 637 Wright, K.J., L.M. Baye, A. Olivier-Mason, S. Mukhopadhyay, L. Sang, M. Kwong, W. Wang,  
638 P.R. Pretorius, V.C. Sheffield, P. Sengupta, D.C. Slusarski, and P.K. Jackson. 2011. An  
639 ARL3-UNC119-RP2 GTPase cycle targets myristoylated NPHP3 to the primary cilium.  
640 *Genes Dev.* 25:2347–2360. doi:10.1101/gad.173443.111.
- 641 Xia, R., H. Jia, J. Fan, Y. Liu, and J. Jia. 2012. USP8 promotes smoothed signaling by  
642 preventing its ubiquitination and changing its subcellular localization. *PLoS Biol.*  
643 10:e1001238. doi:10.1371/journal.pbio.1001238.
- 644 Xu, Q., Y. Zhang, Q. Wei, Y. Huang, Y. Li, K. Ling, and J. Hu. 2015. BBS4 and BBS5 show  
645 functional redundancy in the BBSome to regulate the degradative sorting of ciliary  
646 sensory receptors. *Sci. Rep.* 5:11855. doi:10.1038/srep11855.
- 647 Yau, R., and M. Rape. 2016. The increasing complexity of the ubiquitin code. *Nat. Cell Biol.*  
648 18:579–586. doi:10.1038/ncb3358.
- 649 Ye, F., A.R. Nager, and M.V. Nachury. 2018. BBSome trains remove activated GPCRs from  
650 cilia by enabling passage through the transition zone. *J. Cell Biol.* 217:1847–1868.  
651 doi:10.1083/jcb.201709041.
- 652 Yue, S., L.-Y. Tang, Y. Tang, Y. Tang, Q.-H. Shen, J. Ding, Y. Chen, Z. Zhang, T.-T. Yu, Y.E.  
653 Zhang, and S.Y. Cheng. 2014. Requirement of Smurf-mediated endocytosis of Patched1  
654 in sonic hedgehog signal reception. *eLife.* 3:128. doi:10.7554/eLife.02555.
- 655 Zhang, Q., D. Nishimura, S. Seo, T. Vogel, D.A. Morgan, C. Searby, K. Bugge, E.M. Stone, K.  
656 Rahmouni, and V.C. Sheffield. 2011. Bardet-Biedl syndrome 3 (Bbs3) knockout mouse

657 model reveals common BBS-associated phenotypes and Bbs3 unique phenotypes. *Proc*  
658 *Natl Acad Sci U A*. 108:20678–20683. doi:10.1073/pnas.1113220108.

659

660

661 **ACKNOWLEDGMENTS**

662 We thank Drs. Kirk Mykytyn, Val Sheffield, Alice Ting, and Mark Scott for the gifts of cDNAs;  
663 Kathryn Anderson, Vishva Dixit, and Felice Dunn for the gifts of antibodies; Val Sheffield for  
664 the gift of the *Bbs4*<sup>-/-</sup> mice, George B. Witman and the Chlamydomonas Resource Center for the  
665 gift of *Chlamydomonas* strains; Yien-Ming Kuo for help with cryosections of mouse retina and core  
666 support; Dhivya Kumar and Tyler Picariello for the assistance with *Chlamydomonas* cultures;  
667 Nicholas Morante and Jeremy Reiter for providing *Bbs4*<sup>-/-</sup> mouse eyes; Fan Ye for generating  
668 some of the cell lines used in the study; Irene Ojeda Naharros for help with single cilia tracking,  
669 the Nachury and von Zastrow labs for helpful discussions and the Ogden and Caspary labs for  
670 comments on the preprint. This work was funded by NIGMS (R01-GM089933, M.V.N.). This  
671 work was made possible, in part, by NEI EY002162 - Core Grant for Vision Research and by  
672 the Research to Prevent Blindness Unrestricted Grant (M.V.N.). Authors contributions: SRS  
673 conducted all experimental work except for the experiments in Figure 5 which were conducted  
674 by ARN. MVN supervised research. SRS and MVN wrote the manuscript.  
675

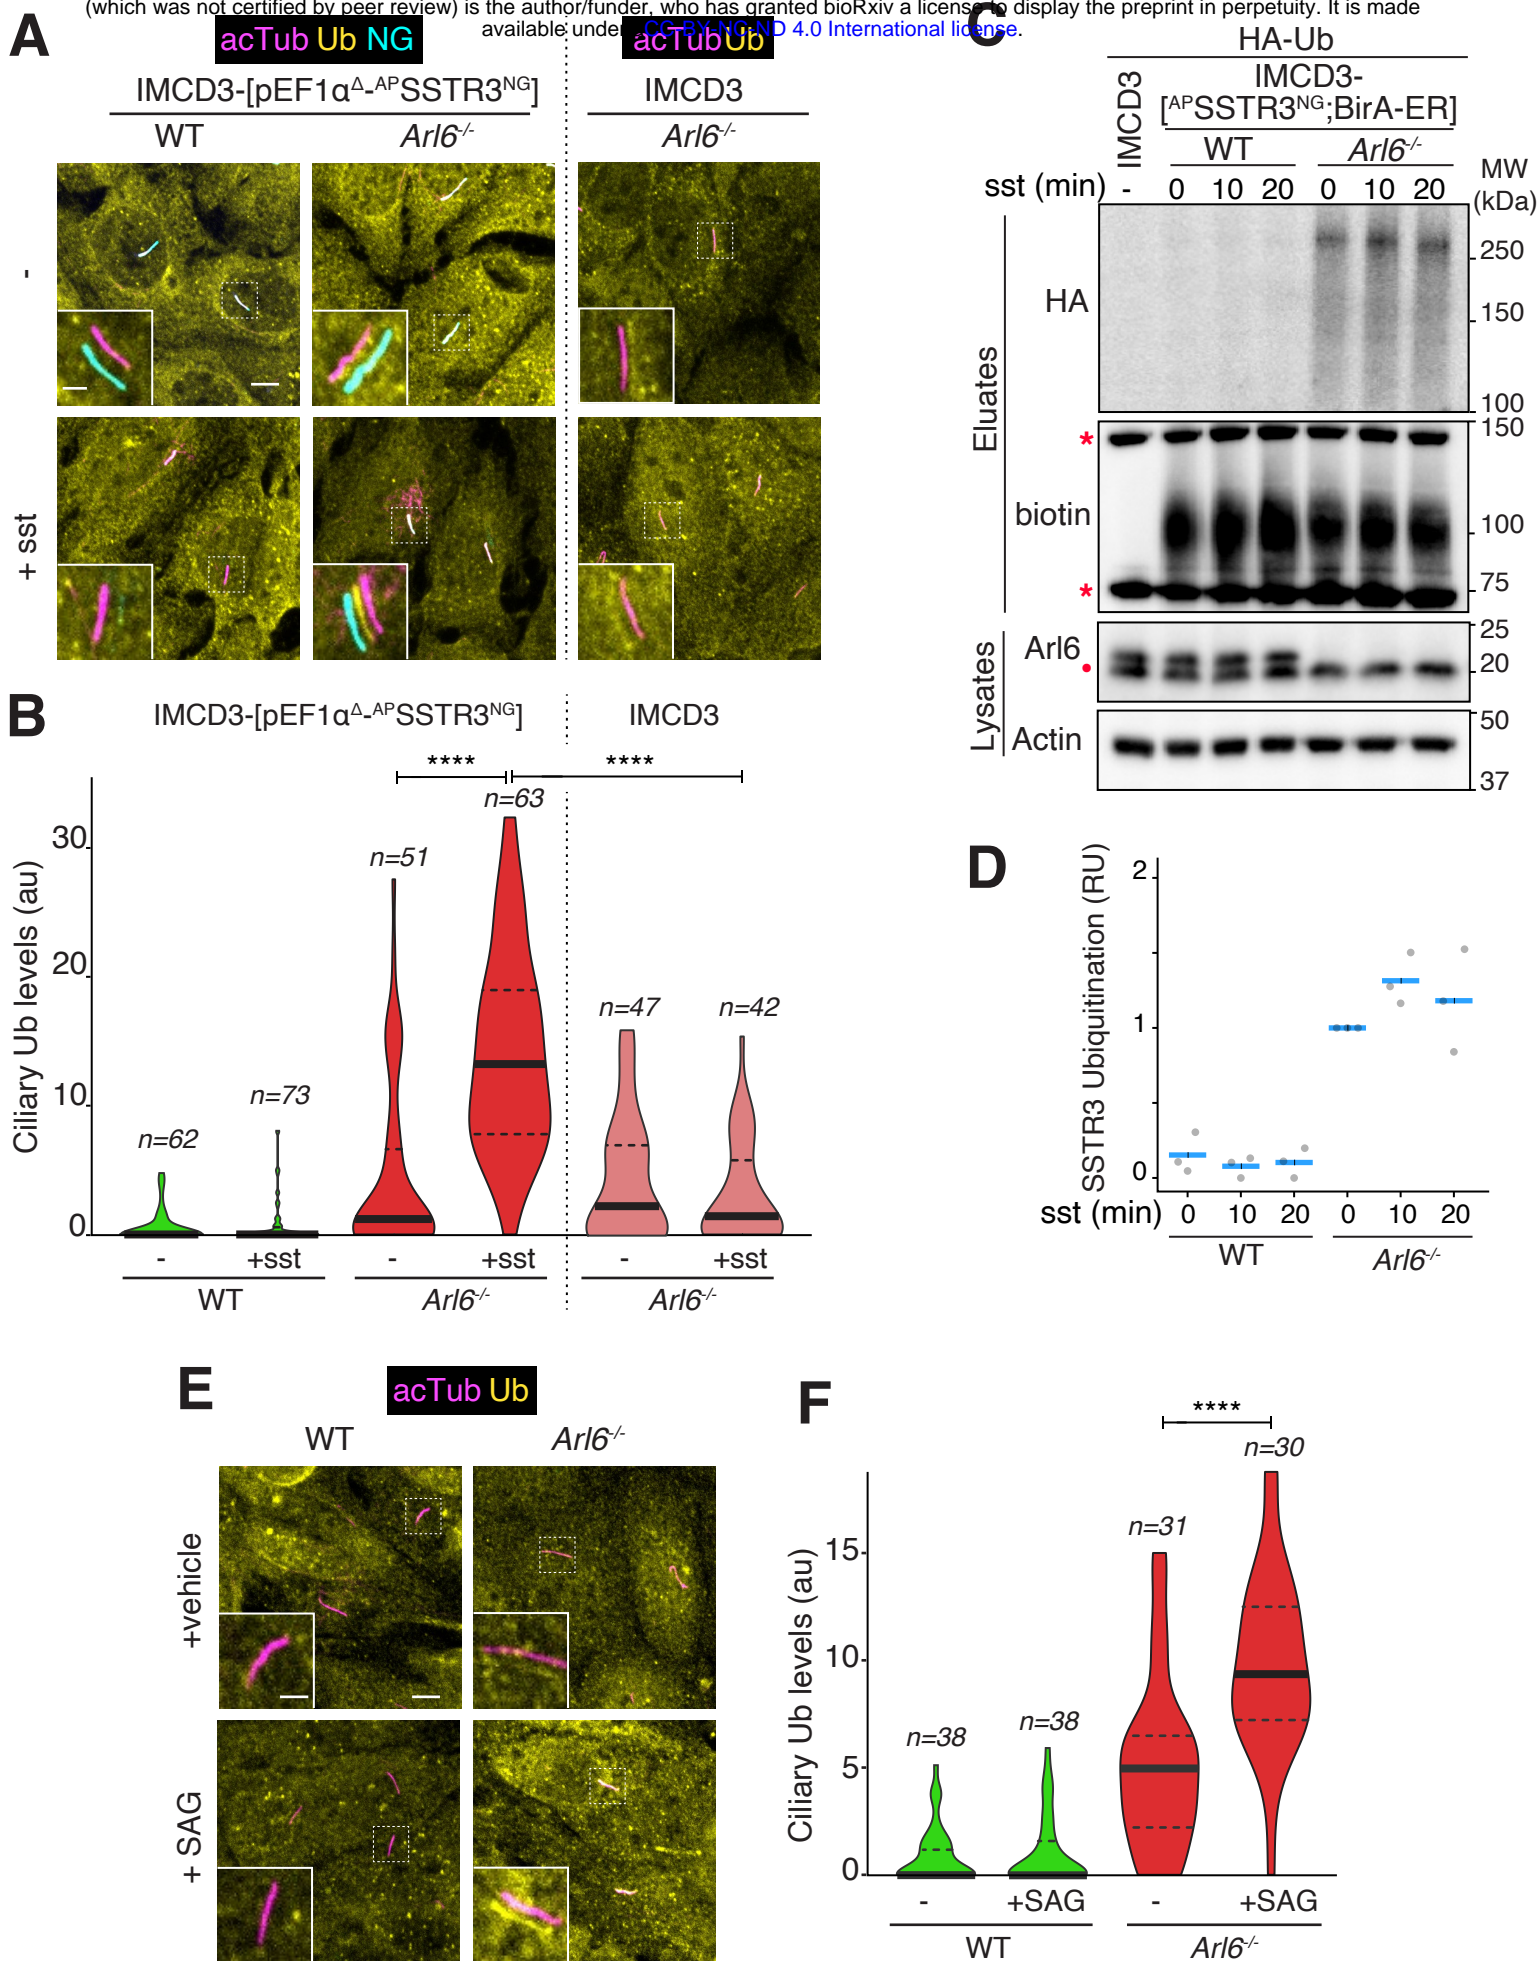

**Figure 1**

676 **Figure 1. Ubiquitinated signaling receptors accumulate inside cilia of *Arl6*<sup>-/-</sup> cells**

677 **A.** SSTR3 fused to the fluorescent protein mNeonGreen (NG) at its intracellular C-terminus and  
678 a biotinylation Acceptor Peptide (AP) tag at its extracellular N-terminus was expressed under the  
679 control of an attenuated EF1 $\alpha$  promoter (pEF1 $\alpha^{\Delta}$ ) in wild type (WT) and *Arl6*<sup>-/-</sup> IMCD3 cells.  
680 Cells were treated with or without somatostatin-14 (sst) for 2 h, then fixed and stained for  
681 acetylated tubulin (acTub, magenta) and ubiquitin (Ub, yellow). <sup>AP</sup>SSTR3<sup>NG</sup> (cyan) was imaged  
682 through the intrinsic fluorescence of NG. Channels are shifted in the insets to facilitate  
683 visualization of overlapping ciliary signals. Scale bar: 5 $\mu$ m (main panel), 2 $\mu$ m (inset). In WT cells,  
684 the ciliary SSTR3 signal decreases over the experimental time course. In *Arl6*<sup>-/-</sup> cells, SSTR3 fails  
685 to exit cilia and an increase in the ciliary Ub level is detected. As a control, *Arl6*<sup>-/-</sup> cells that did  
686 not express SSTR3-NG were tested; no increase in ciliary Ub levels was observed upon addition  
687 of sst. **B.** The fluorescence intensity of the Ub channel in the cilium was measured in each  
688 condition and the data are represented as violin plots. The thick bar indicates the median and the  
689 dotted lines the first and third quartiles. An 11-fold increase in ciliary Ub signal is observed upon  
690 addition of sst to SSTR3-expressing cells. Asterisks indicate ANOVA significance value. \*\*\*\*, p=  
691 <0.0001. **C.** WT or *Arl6*<sup>-/-</sup> IMCD3 cells stably expressing <sup>AP</sup>SSTR3<sup>NG</sup> and the biotin ligase BirA  
692 targeted to the ER lumen (BirA-ER ) were transiently transfected with HA-tagged ubiquitin (HA-  
693 Ub). 10  $\mu$ M biotin was added to cells 24 h post transfection for maximal biotinylation of  
694 <sup>AP</sup>SSTR3<sup>NG</sup> and, after another 18 h, cells were treated with sst (10 $\mu$ M) for indicated times. Cells  
695 were lysed under denaturing conditions and biotinylated SSTR3 was captured on streptavidin  
696 resin. Eluates were probed for HA via immunoblotting and for biotin via streptavidin-HRP. Two  
697 major biotinylated proteins endogenous to cells are marked by asterisks. Whole cell lysates were  
698 probed for *Arl6* and, as a loading control, actin. A non-specific band cross-reacting with the anti-  
699 *Arl6* antibody is marked with a dot. **D.** Quantitation of SSTR3 ubiquitination. The signals of  
700 HA-Ub conjugated to SSTR3 in the streptavidin eluates were measured. The experiment shown  
701 in **C** was repeated three times and for each experiment, Ub-SSTR3 signals were normalized to  
702 the value in *Arl6*<sup>-/-</sup> cells at t = 0 of sst stimulation and plotted as grey circles. The horizontal blue  
703 lines represent mean values. **E.** IMCD3 cells of the indicated genotypes were treated with the

704 Smoothened agonist SAG or the vehicle DMSO for 2h. Cells were then fixed and stained for  
705 acTub and Ub. Channels are shifted in the insets to facilitate visualization of overlapping ciliary  
706 signals. Scale bar 5 $\mu$ m (main panel), 2 $\mu$ m (inset). Activation of Hh signaling promotes a  
707 detectable increase in ciliary Ub levels only in *Arl6*<sup>-/-</sup> cells. **F.** Violin plots of the fluorescence  
708 intensity of the Ub channel in the cilium in each condition are shown. Asterisks indicate  
709 ANOVA significance value. \*\*\*\*, p= <0.0001.

710

711

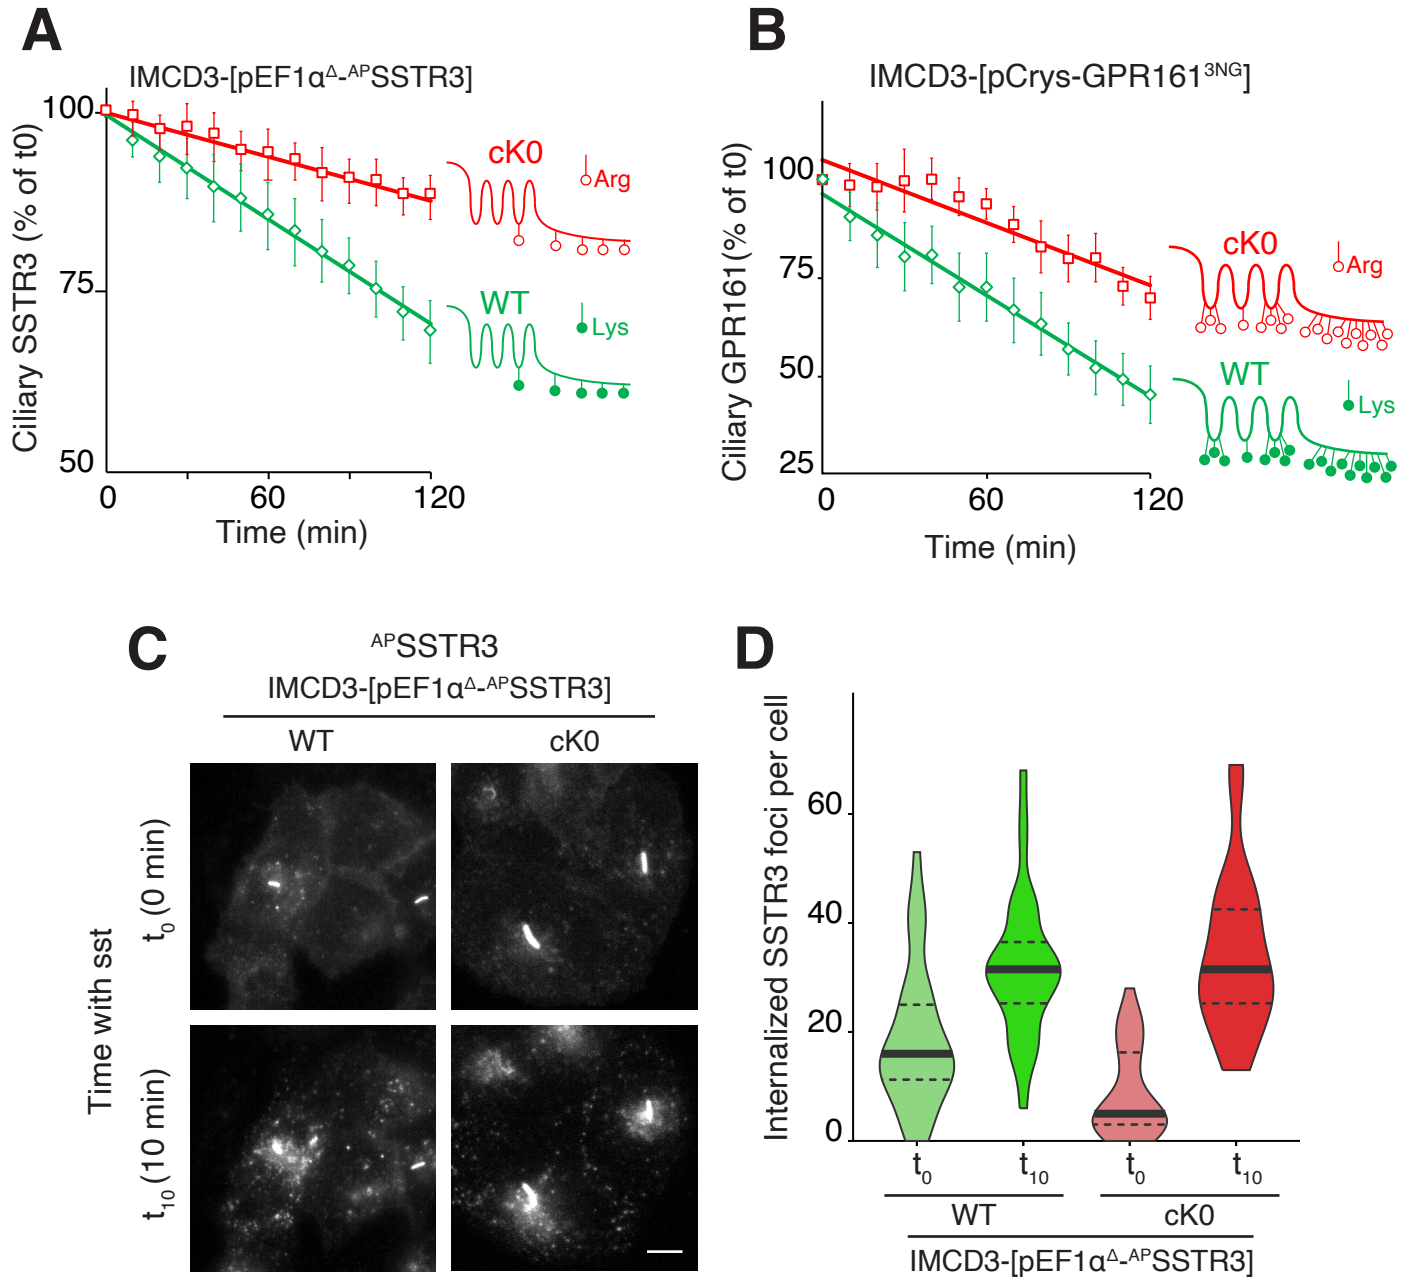

Figure 2

712 **Figure 2. Ubiquitination of ciliary GPCRs is required for signal-dependent exit but**  
713 **not for endocytosis.**

714 **A.** IMCD3-[pEF1 $\alpha^{\Delta}$ -<sup>AP</sup>SSTR3] cells stably expressed the ER-localized biotin ligase BirA to  
715 enables the biotinylation of <sup>AP</sup>SSTR3. SSTR3 was either the wild-type allele (WT) or a variant  
716 where all five cytoplasm-facing lysine residues (listed in Methods) were mutated to arginine (cK0).  
717 Ciliary <sup>AP</sup>SSTR3 was pulse-labeled by addition of Alexa647-conjugated mSA (mSA647) to the  
718 medium for 5-10 min before addition of sst. Far red fluorescence was tracked in individual cilia at  
719 10 min capture intervals. For each individual cilia, fluorescence intensities were normalized to  
720 the value at  $t = 0$ . A comparison of the ciliary levels of SSTR3 at  $t=0$  is shown in **Fig. S2A**. Data  
721 were plotted and fitted to a line. Error bars: 95% CI.  $N=18-22$  cilia. **B.** GPR161 fused to three  
722 tandem repeats of NG at its C-terminus was expressed under the control of the ultra-weak  $\delta$ -  
723 crystallin promoter (pCrys) in IMCD3 cells. GPR161 was either the wild-type allele (WT) or a  
724 variant where all eighteen cytoplasm-facing lysine residues (listed in Methods) were mutated to  
725 arginine (cK0). IMCD3-[pCrys-GPR161<sup>3NG</sup>] cells were treated with SAG for 2h. During the  
726 course of the experiment, NG fluorescence was tracked in individual cilia at 10 min capture  
727 intervals. Fluorescence data were acquired and analyzed as in panel **(A)**. A comparison of the  
728 ciliary levels of GPR161 at  $t=0$  is shown in **Fig. S2B**. Error bars: 95% CI.  $N=10-19$  cilia. **C.**  
729 IMCD3-[<sup>AP</sup>SSTR3; BirA-ER] cells expressing either WT or cK0 SSTR3 were pulse-labeled by  
730 addition of Alexa647-conjugated mSA (mSA647) to the medium for 5 min before addition of sst  
731 and were imaged by far red fluorescence immediately after addition of sst ( $t_0$ ) and 10 min later  
732 ( $t_{10}$ ). The contrast level was adjusted to reveal plasma membrane-localized and internalized  
733 <sup>AP</sup>SSTR3, causing the cilia-localized <sup>AP</sup>SSTR3 signal to reach saturation. Scale bar 5 $\mu$ m. **D.**  
734 Internalized <sup>AP</sup>SSTR3 foci were counted immediately after addition of sst ( $t_0$ ) and 10 min later  
735 ( $t_{10}$ ),  $n = 34$  cells.



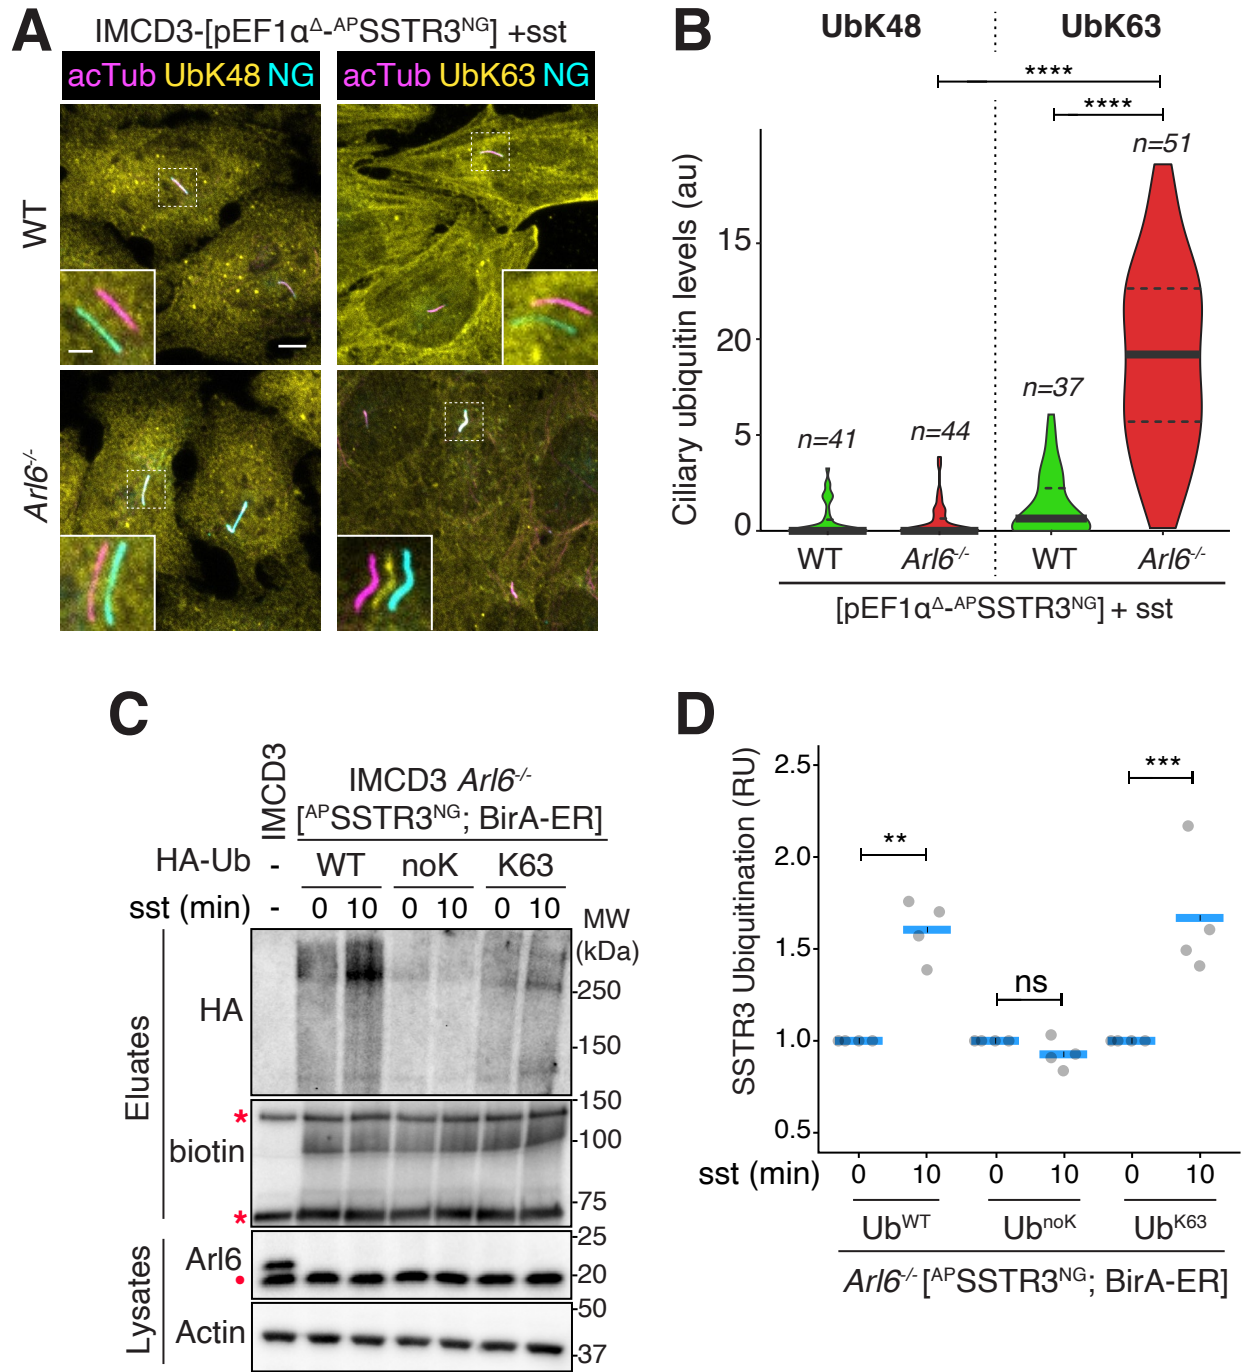

**Figure 3**

736 **Figure 3. Signal-dependent accumulation of K63-linked ubiquitin chains inside**  
737 **cilia of *Bbs* mutant cells.**

738 **A.** IMCD3 cells of the indicated genotypes expressing  $^{AP}SSTR3^{NG}$  were treated with  
739 somatostatin-14 for 2 h. Cells were fixed and stained for AcTub (magenta) and with antibodies  
740 specific for the lysine 63 (UbK63) or lysine 48 (UbK48) Ub chain linkages (yellow).  $SSTR3^{NG}$   
741 (cyan) was imaged through the intrinsic fluorescence of NG. Channels are shifted in the insets to  
742 facilitate visualization of overlapping ciliary signals. Scale bar 5 $\mu$ m (main panel), 2 $\mu$ m (inset). **B.**  
743 The fluorescence intensity of the UbK48 and UbK63 channels in the cilium are represented as  
744 violin plots. A 14-fold increase in ciliary Ub abundance is detected with the K63Ub linkage-  
745 specific antibody. Asterisks indicate ANOVA significance value. \*\*\*\*,  $p = < 0.0001$ . No ciliary  
746 signal is detected with the K48Ub linkage-specific antibody. **C.** *Arl6*<sup>-/-</sup> IMCD3-[<sup>AP</sup>SSTR3; BirA-  
747 ER] cells were transfected with the HA-tagged ubiquitin variants WT, noK0 (all seven acceptor  
748 lysine residues mutated to arginine) or K63 (where all lysine residues are mutated to arginine  
749 except for K63). Biotin was included in the culture medium and cells were treated with sst for 0  
750 or 10 min. Cells were lysed under denaturing conditions and biotinylated SSTR3 was captured  
751 on streptavidin resin. Eluates were probed for HA via immunoblotting and for biotin via  
752 streptavidin-HRP. Two major biotinylated proteins endogenous to cells are marked by asterisks.  
753 Whole cell lysates were probed for *Arl6* and, as a loading control, actin. A non-specific band  
754 cross-reacting with the anti-*Arl6* antibody is marked with a dot. WT IMCD3 cells were processed  
755 in parallel as a control. **D.** Quantitation of SSTR3 ubiquitination. The signals of HA-Ub  
756 conjugated to SSTR3 in the streptavidin eluates were measured. The experiment shown in **C**  
757 was repeated four times and for each Ub variant, Ub-SSTR3 signals were normalized to the  
758 value at  $t = 0$  of sst stimulation and plotted as grey circles. The horizontal blue lines represent  
759 mean values. Asterisks indicate ANOVA significance value. \*\*\*  $p = < 0.001$ ; \*\*  $p = < 0.01$ .  
760

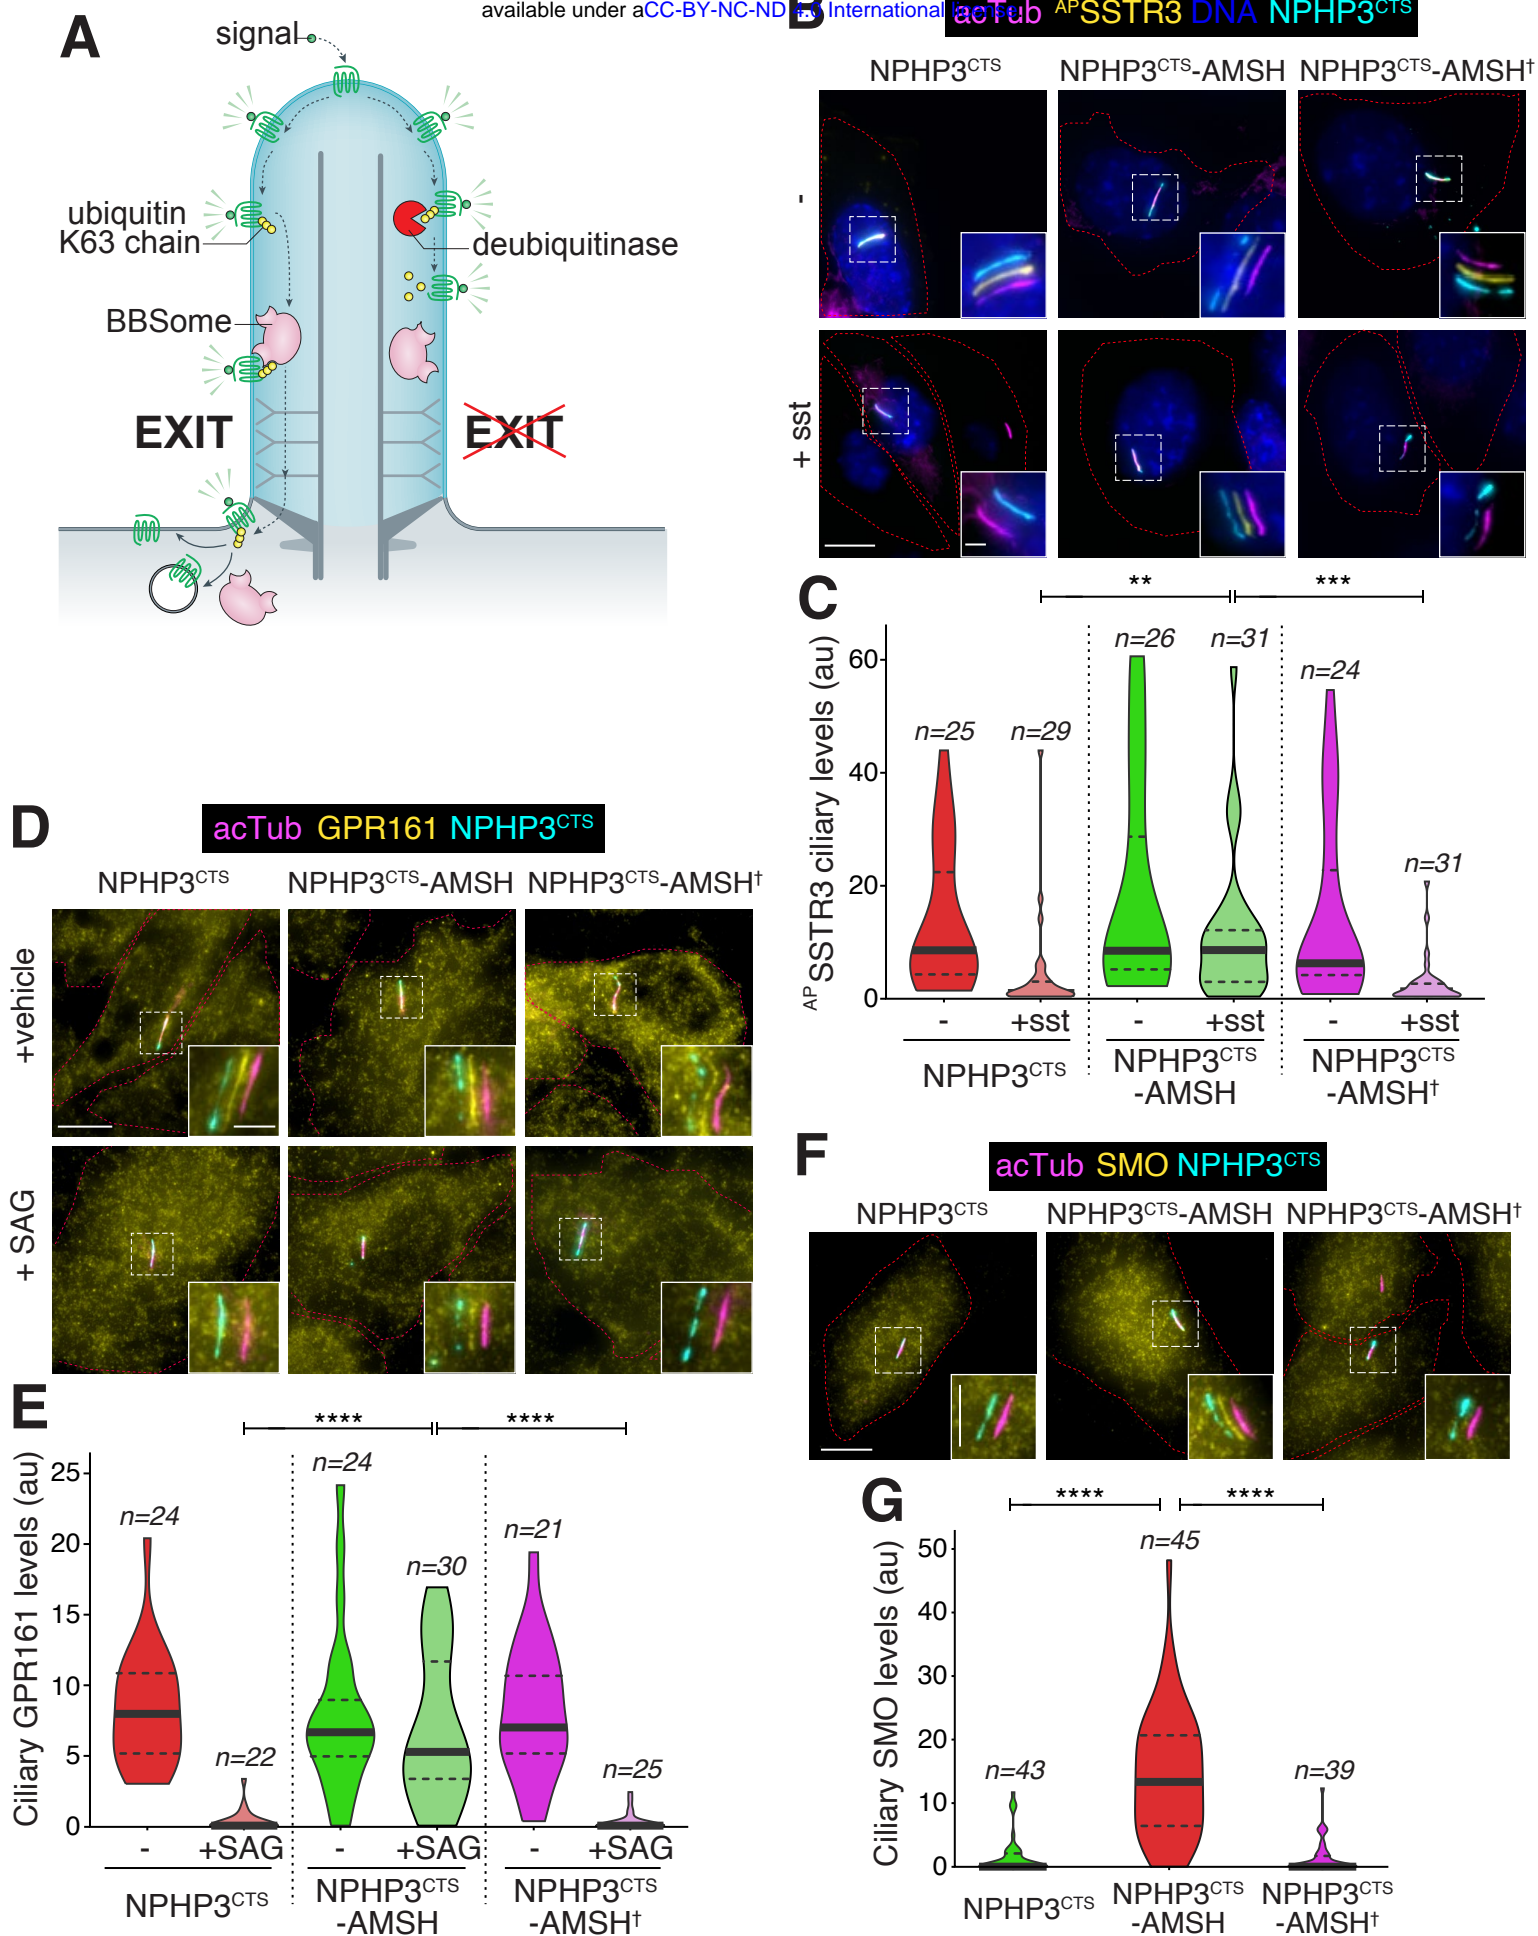

Figure 4

761 **Figure 4. Ciliary K63-linked ubiquitin chains are required for GPCR exit from**  
762 **cilia.**

763 **A.** Diagram of the working model and the experimental strategy. **B.** IMCD3-[pEF1 $\alpha$ -  
764 <sup>AP</sup>SSTR3; pEF1 $\alpha$ -BirA•ER] were transfected with plasmids expressing the ciliary targeting signal  
765 (CTS) of NPHP3 fused to GFP only (left panels), to GFP and the catalytic domain of the K63-  
766 specific deubiquitinase AMSH (middle panels), or to GFP and the catalytically inactive E280A  
767 variant of AMSH catalytic domain (AMSH<sup>†</sup>, right panels). Ciliary <sup>AP</sup>SSTR3 was pulse-labeled  
768 with mSA647 for 5-10 min and cells were then treated with or without sst for 2h, before fixation  
769 and staining for acetylated tubulin (acTub, magenta) and DNA (blue). The NPHP3<sup>CTS</sup> fusions  
770 were visualized through the intrinsic fluorescence of GFP (cyan) and <sup>AP</sup>SSTR3 was visualized via  
771 mSA647 (yellow). Channels are shifted in the insets to facilitate visualization of overlapping  
772 ciliary signals. Scale bar 5 $\mu$ m (main panel), 2 $\mu$ m (inset). **C.** The fluorescence intensities of ciliary  
773 <sup>mSA647-AP</sup>SSTR3 are represented as violin plots. Asterisks indicate Kruskal-Wallis test significance  
774 values. \*\*\*, p= <0.001; \*\*, p= <0.01. Addition of sst triggers the exit of SSTR3 from cilia in cells  
775 transfected with the controls NPHP3<sup>CTS</sup> and NPHP3<sup>CTS</sup>-AMSH<sup>†</sup> but NPHP3<sup>CTS</sup>-AMSH blocks  
776 ciliary exit of SSTR3. **D.** RPE1-hTERT (RPE) cells transfected with the indicated constructs  
777 were treated with SAG or vehicle (DMSO) for 2h, then fixed and stained for acetylated tubulin  
778 (magenta) and GPR161 (yellow). The NPHP3<sup>CTS</sup> fusions were visualized through the intrinsic  
779 fluorescence of GFP (cyan). Channels are shifted in the insets to facilitate visualization of  
780 overlapping ciliary signals. Scale bar 5 $\mu$ m (main panel), 2 $\mu$ m (inset). **E.** The fluorescence  
781 intensities of ciliary GPR161 are represented as violin plots. Asterisks indicate ANOVA  
782 significance value. \*\*\*\*, p= <0.0001. NPHP3<sup>CTS</sup>-AMSH specifically blocks the SAG-dependent  
783 exit of GPR161 from cilia. **F.** IMCD3 cells transfected with the indicated constructs were fixed  
784 and stained for acetylated tubulin (magenta) and SMO (yellow). The NPHP3<sup>CTS</sup> fusions were  
785 visualized through the intrinsic fluorescence of GFP (cyan). Channels are shifted in the insets to  
786 facilitate visualization of overlapping ciliary signals. **G.** The fluorescence intensities of ciliary  
787 SMO are represented as violin plots. Asterisks indicate ANOVA significance value. \*\*\*\*, p=

788 <0.0001. NPHP3<sup>CTS</sup>-AMSH specifically blocks the constitutive exit of SMO from cilia and  
789 promotes accumulation of SMO in cilia in the absence of pathway activation.

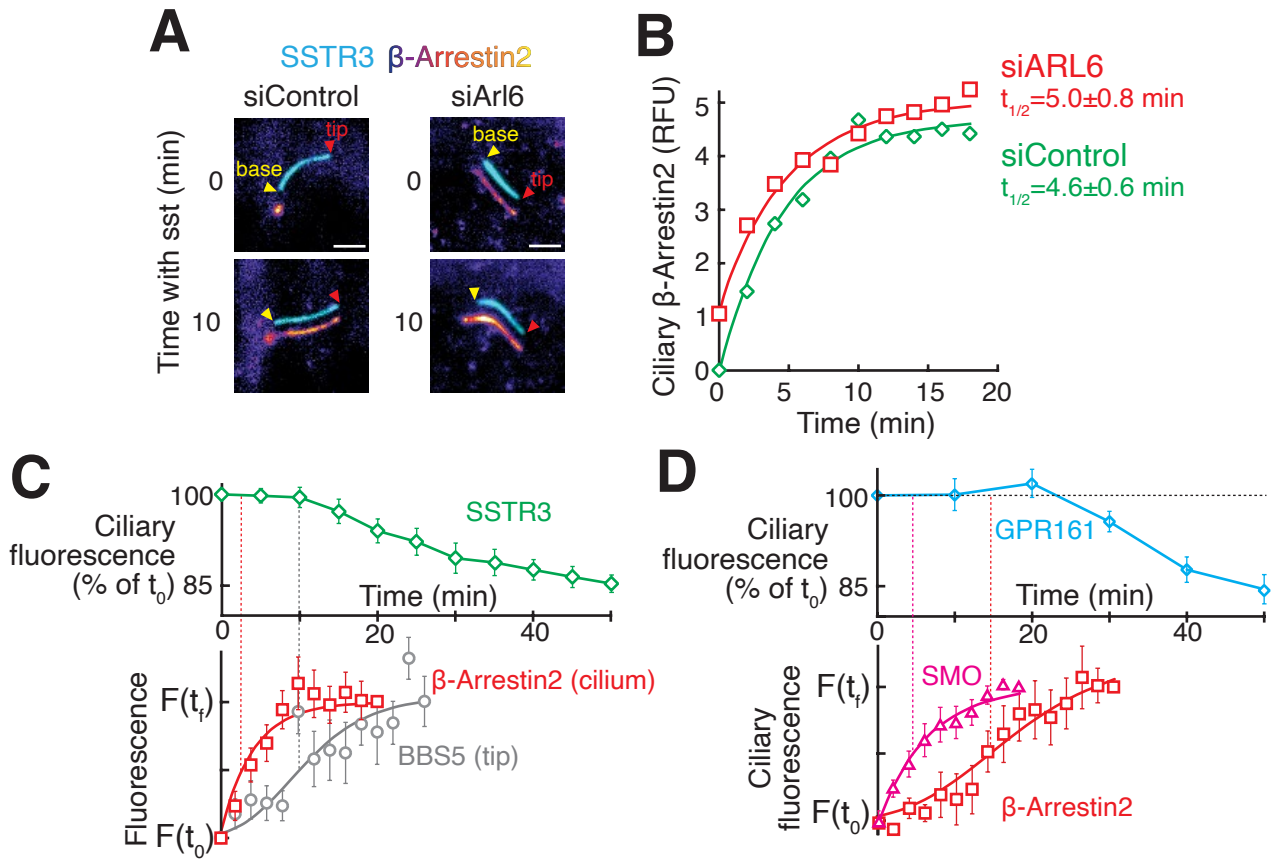

Figure 5

790 **Figure 5.  $\beta$ -arrestin 2 is recruited to cilia upon activation of SSTR3 or GPR161.**

791 **A.**  $\beta$ -Arrestin2 is rapidly recruited to cilia upon activation of SSTR3. siRNA-treated IMCD3-  
792 [<sup>AP</sup>SSTR3,  $\beta$ -Arrestin2<sup>GFP</sup>] cells were pulse-labeled with mSA647 before addition of sst.  
793 Channels are shifted to facilitate visualization of overlapping ciliary signals. As shown previously  
794 (Shankar et al., 2010),  $\beta$ -Arrestin2 is at the basal body in unstimulated cells. Scale bar: 2  $\mu$ m. **B.**  
795 Kinetics of  $\beta$ -Arrestin2<sup>GFP</sup> recruitment to cilia upon sst stimulation in control- and ARL6-  
796 depleted IMCD3-[<sup>AP</sup>SSTR3,  $\beta$ -Arrestin2<sup>GFP</sup>] cells. Data were fit to a simple exponential. (n=10  
797 cilia). **C-D.** Kinetics of early trafficking events for retrieval of SSTR3 (**C**) and GPR161 (**D**). The  
798 top panels show removal of stably expressed <sup>AP</sup>SSTR3<sup>NG</sup> or <sup>AP</sup>GPR161<sup>NG3</sup> following addition of  
799 sst (**C**) or SAG (**D**). The bottom panels show the kinetics of  $\beta$ -Arrestin2<sup>GFP</sup> entry (**C-D**),  
800 <sup>AP</sup>Smoothened<sup>NG</sup> entry (**D**), and <sup>NG3</sup>BBS5 tip accumulation (**C**) measured in IMCD3 cells stably  
801 expressing the indicated proteins. Fluorescence values are normalized to the initial ( $t_0$ ) and final  
802 ( $t_f$ ) values. Error bars: SEM. (n=6-11 cilia).  
803

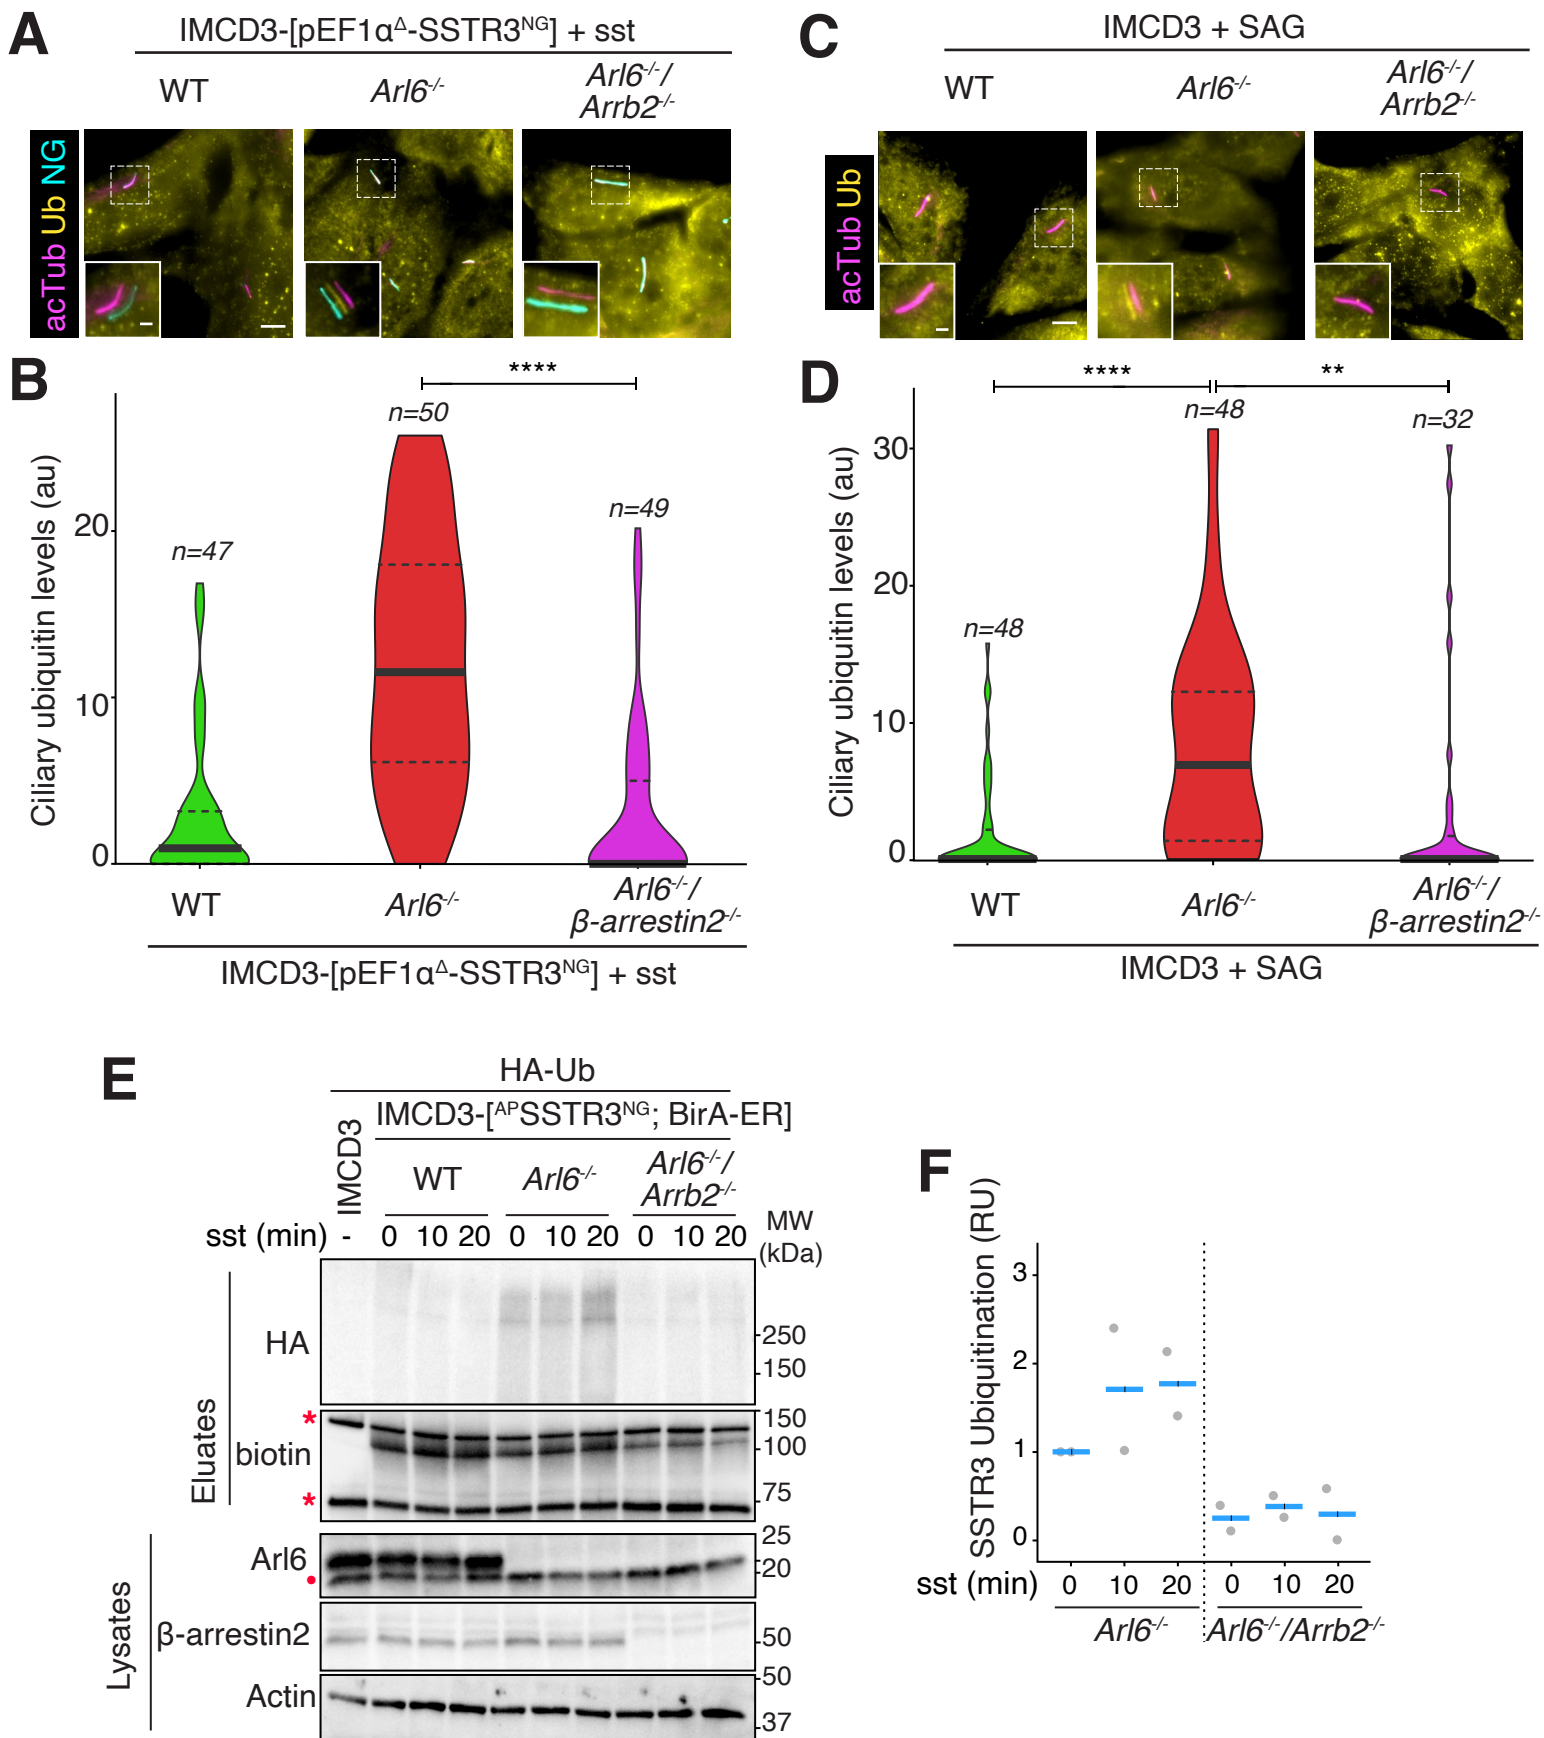

**Figure 6**



804 **Figure 6.  $\beta$ -arrestin 2 directs the signal-dependent ubiquitination of ciliary**  
805 **GPCRs.**

806 **A.** IMCD3-[pEF1 $\alpha$ -<sup>AP</sup>SSTR3<sup>NG</sup>] cells of the indicated genotypes were treated with sst for 2h  
807 before fixation and staining for acetylated tubulin (acTub, magenta) and ubiquitin (Ub, yellow).  
808 SSTR3<sup>NG</sup> was visualized through the intrinsic fluorescence of NG (cyan). Channels are shifted in  
809 the insets to facilitate visualization of overlapping ciliary signals. SSTR3 exit is blocked in *Arl6*<sup>-/-</sup>  
810 cells regardless of the  $\beta$ -Arrestin2 genotype but the ciliary Ub signal is only evident when  $\beta$ -  
811 Arrestin2 function is intact. Scale bar: 5 $\mu$ m (main panel), 1 $\mu$ m (inset). **B.** Violin plots  
812 representing the ciliary levels of Ub under the indicated conditions. Asterisks indicate ANOVA  
813 significance value. \*\*\*\*, p= <0.0001. **C.** IMCD3 WT, knockout for *Arl6* only and double  
814 knockout for *Arl6* and the  $\beta$ -Arrestin2 gene *Arb2* were treated with SAG for 2h before fixation  
815 and staining for acetylated tubulin (acTub, magenta) and ubiquitin (Ub, yellow). Channels are  
816 shifted in the insets to facilitate visualization of overlapping ciliary signals. Scale bar: 5 $\mu$ m (main  
817 panel), 1 $\mu$ m (inset). **D.** Violin plots representing the ciliary Ub levels. Asterisks indicate ANOVA  
818 significance value. \*\*\*\*, p= <0.0001; \*\*, p= <0.01. The appearance of a Ub signal in cilia in  
819 *Arl6*<sup>-/-</sup> cells depends on  $\beta$ -Arrestin2. **E.** IMCD3-[<sup>AP</sup>SSTR3; BirA-ER] cells of the indicated  
820 genotypes stably expressing <sup>AP</sup>SSTR3<sup>NG</sup> and BirA-ER were transfected with HA-Ub, biotin was  
821 added to the medium and cells were treated with sst for indicated times. Biotinylated SSTR3 was  
822 captured from cell lysates under denaturing conditions on streptavidin resin. Eluates were probed  
823 for HA via immunoblotting and for biotin via streptavidin-HRP. Two major biotinylated  
824 proteins endogenous to cells are marked by asterisks. Whole cell lysates were probed for *Arl6*,  $\beta$ -  
825 Arrestin2 to verify genotypes and, as a loading control, actin. A non-specific band cross-reacting  
826 with the anti-*Arl6* antibody is marked with a dot. WT IMCD3 cells were processed in parallel as  
827 a control. **F.** Quantitation of SSTR3 ubiquitination. The signals of HA-Ub conjugated to  
828 SSTR3 in the streptavidin eluates were measured. The experiment shown in **E** was repeated  
829 twice and for each experiment, Ub-SSTR3 signals were normalized to the value in *Arl6*<sup>-/-</sup> cells at  
830 t = 0 of sst stimulation and plotted as grey circles. The horizontal blue lines represent mean  
831 values.

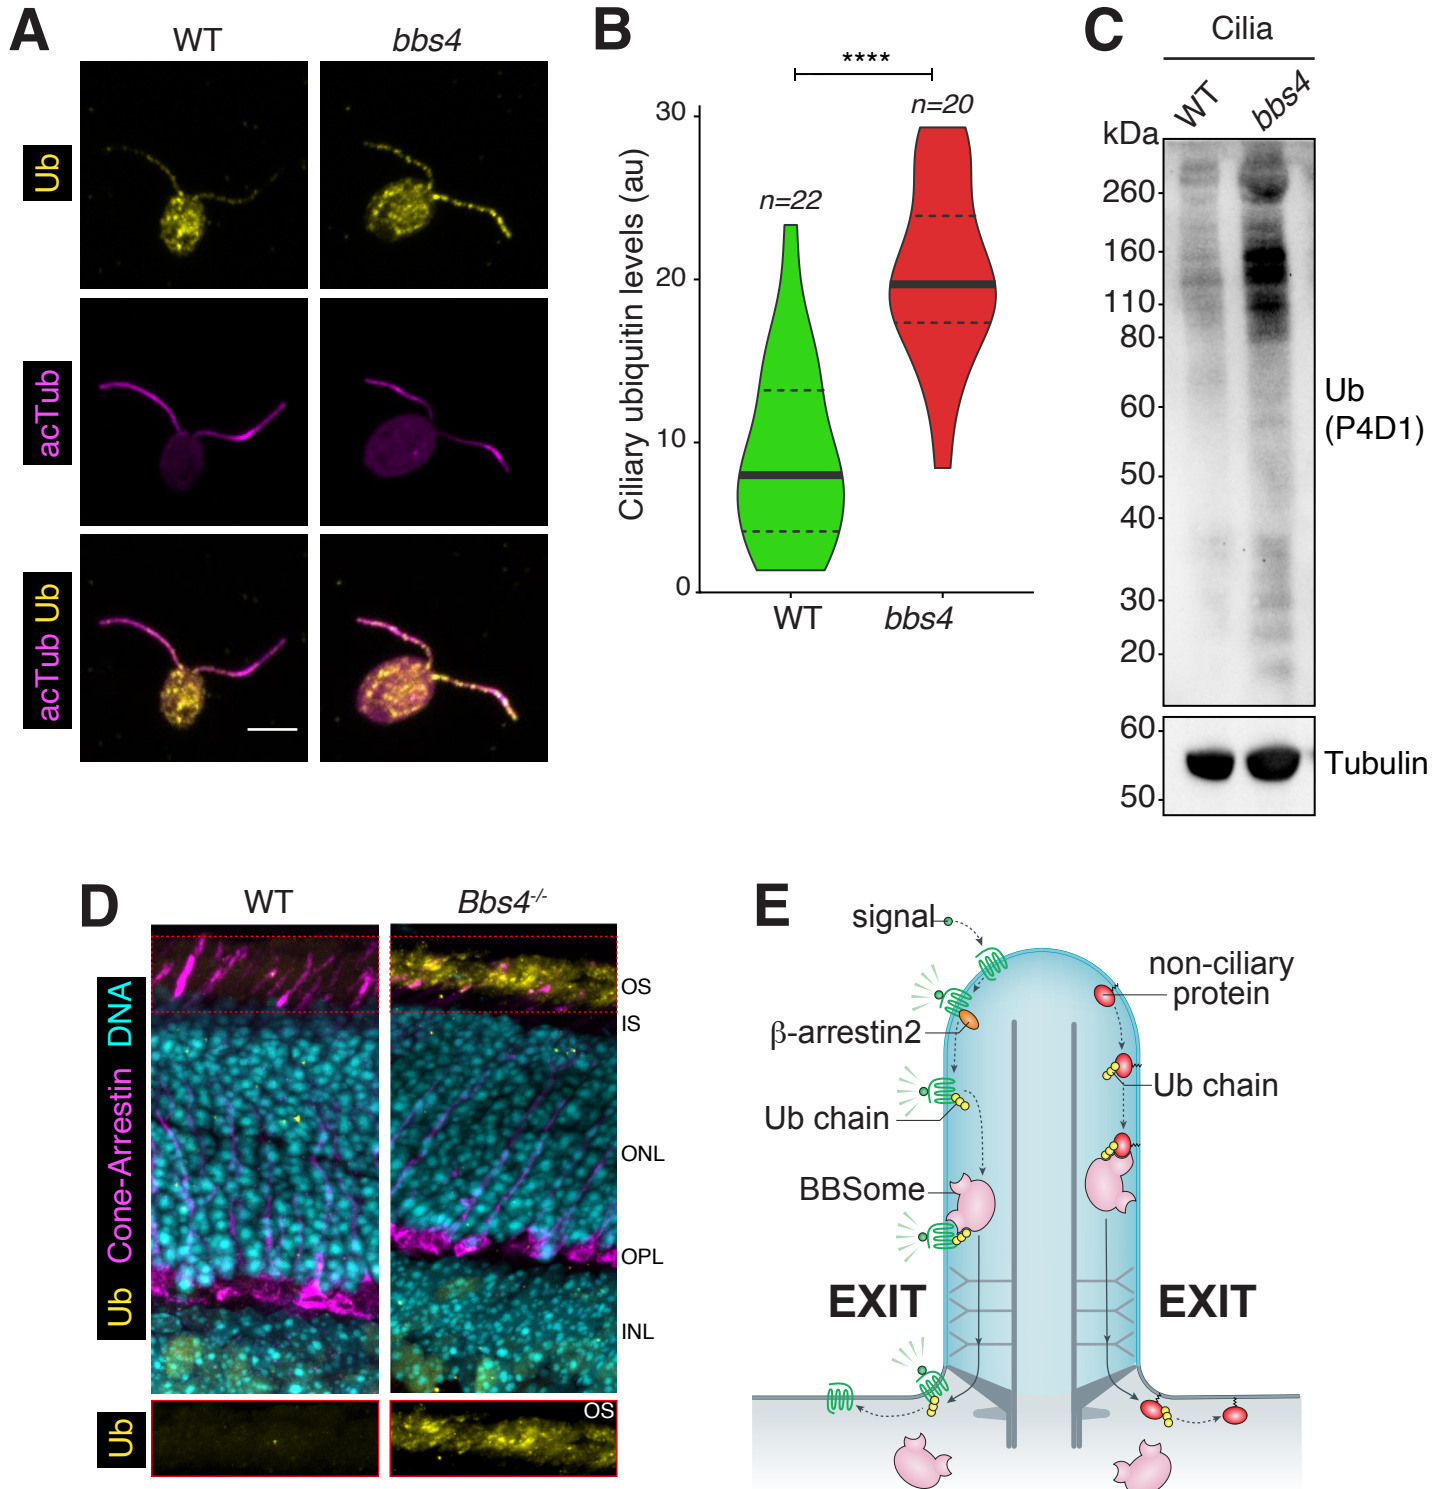

**Figure 7**

832 **Figure 7. Accumulation of ubiquitinated proteins in cilia of *Chlamydomonas* cells**  
833 **and mammalian photoreceptors.**

834 **A.** *Chlamydomonas* cells of the indicated genotypes were fixed and stained for acetylated tubulin  
835 (acTub, magenta) and ubiquitin (Ub, yellow). Scale bar: 5  $\mu$ m. A weak ubiquitin signal detected  
836 in WT cells is increased in *bbs4* mutant cells. **B.** Violin plots of the ciliary Ub levels in WT and  
837 *bbs4 Chlamydomonas* cells. Asterisks indicate Mann-Whitney test significance values. \*\*\*\*,  $p=$   
838  $<0.0001$ . The ciliary levels of Ub are increased more than 2-fold in *bbs4* cells as compared to  
839 WT. **C.** Cilia purified from WT and *bbs4* cells via deciliation with dibucaine and differential  
840 centrifugation were solubilized, and the protein contents resolved by SDS-PAGE. Immunoblots  
841 for Ub (using the P4D1 antibody) and tubulin are shown. A rise in ubiquitin conjugates is  
842 observed in *bbs4 Chlamydomonas* cells compared to WT. **D.** Mouse retina were fixed, embedded  
843 and sectioned before staining for ubiquitin (Ub, yellow, lower panel), cone arrestin (magenta, a  
844 marker of the photoreceptor outer segment layer) and DNA (cyan). OS: outer segment; IS: inner  
845 segment; ONL: outer nuclear layer; OPL: outer plexiform layer; INL: inner nuclear layer. Scale  
846 bar: 10 $\mu$ m. **E.** Model for the role of ubiquitin chains in selecting cargoes for signal-dependent  
847 and constitutive exit via BBSome-mediated transport.  
848

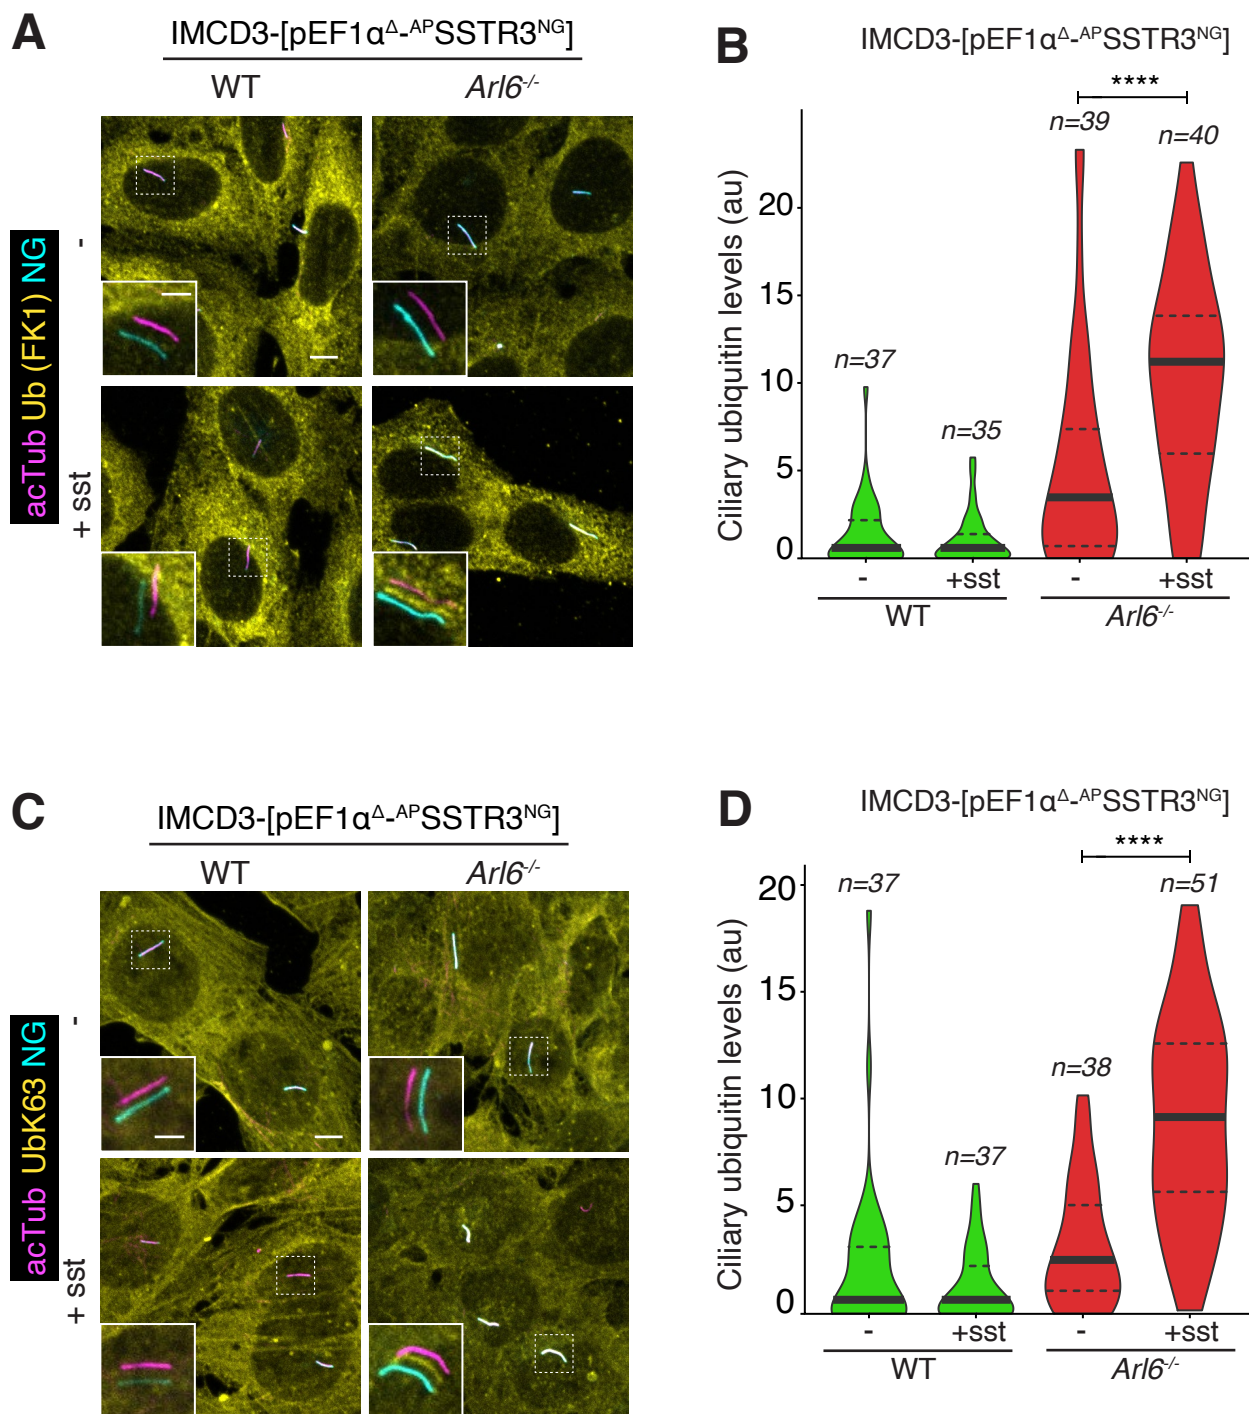

**Supplementary Figure 1**

849 **Figure S1. Signal-dependent ubiquitination of ciliary GPCRs**

850 **A.** IMCD3 cells of the indicated genotypes expressing <sup>AP</sup>SSTR3<sup>NG</sup> were treated with  
851 somatostatin (sst) for 2 h. Cells were fixed and stained for ubiquitin with the FK1 monoclonal  
852 antibody (Ub (FK1), yellow) and acetylated tubulin (acTub, magenta). <sup>AP</sup>SSTR3<sup>NG</sup> (cyan) was  
853 imaged through the intrinsic fluorescence of NG. Channels are shifted in the insets to facilitate  
854 visualization of overlapping ciliary signals. Scale bar: 5µm (main panel), 2µm (inset). **B.** Violin  
855 plots of the fluorescence intensity of the Ub channel in the cilium in each condition are shown. A  
856 3-fold increase in ciliary Ub signal is observed upon addition of sst to SSTR3-expressing cells.  
857 Asterisks indicate ANOVA significance value. \*\*\*\*, p= <0.0001. **C.** IMCD3 cells of the  
858 indicated genotypes expressing <sup>AP</sup>SSTR3<sup>NG</sup> were treated with sst for 2 h. Cells were fixed and  
859 stained for AcTub (magenta) and UbK63 (yellow). <sup>AP</sup>SSTR3<sup>NG</sup> (cyan) was imaged through the  
860 intrinsic fluorescence of NG. Channels are shifted in the insets to facilitate visualization of  
861 overlapping ciliary signals. Scale bar 5µm (main panel), 2µm (inset). **D.** The fluorescence  
862 intensity of the UbK63 channel in the cilium is represented as violin plots. Asterisks indicate  
863 ANOVA significance value. \*\*\*\*, p= <0.0001.

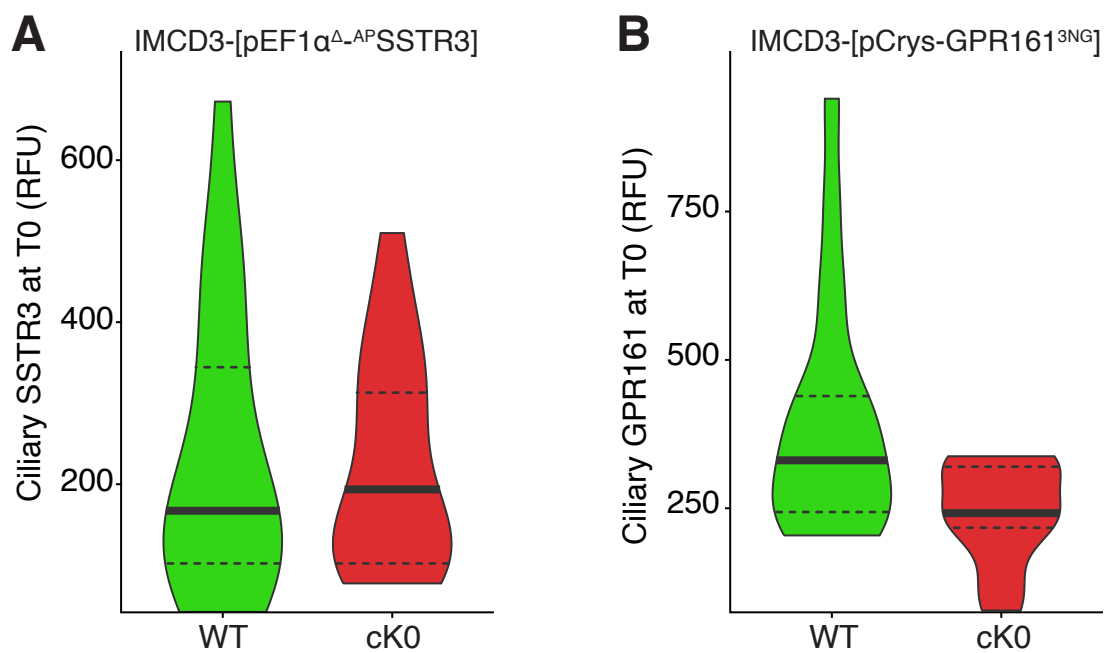

**Supplementary Figure 2**

acTub DNA NPHP3<sup>CTS</sup>

NPHP3<sup>CTS</sup> - AMSH

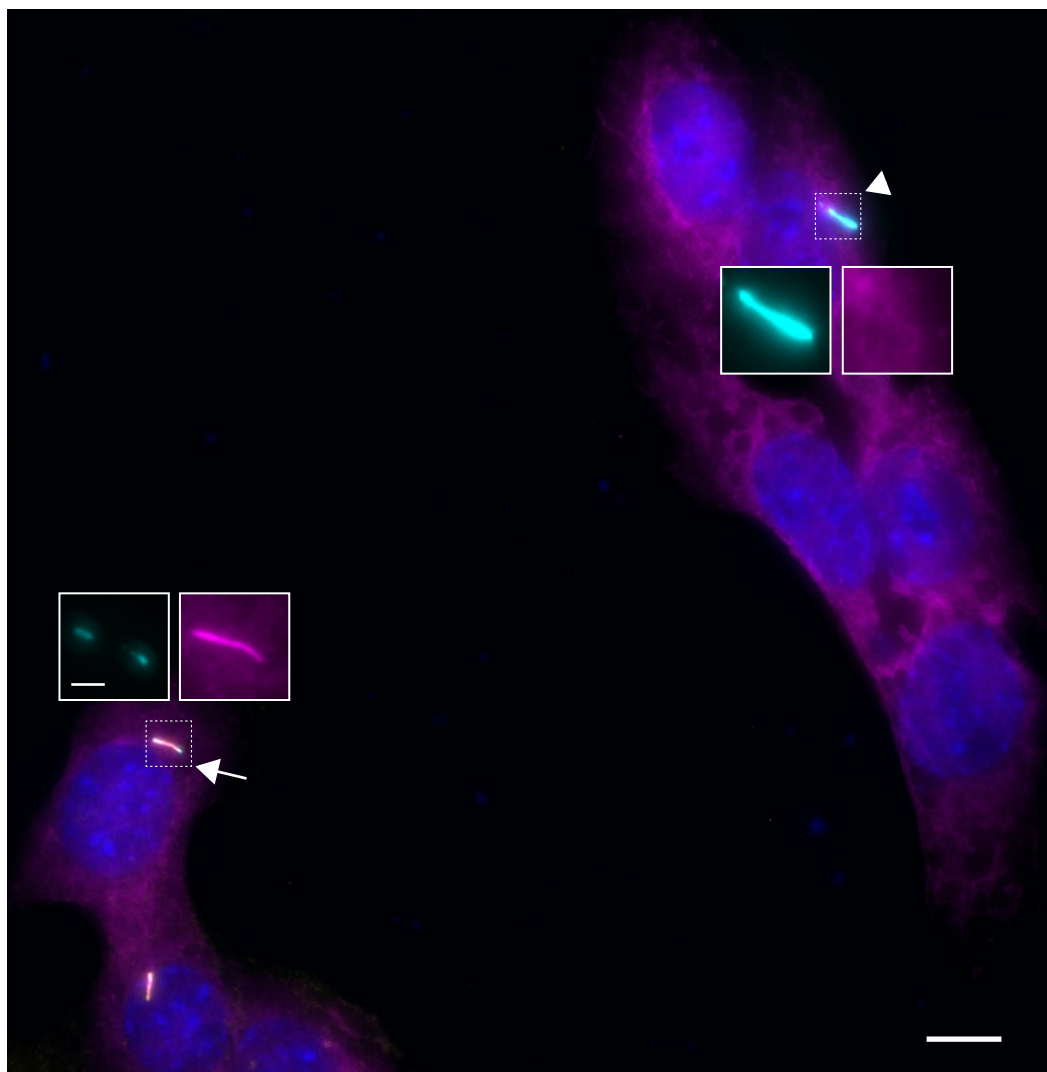

Supplementary figure 3

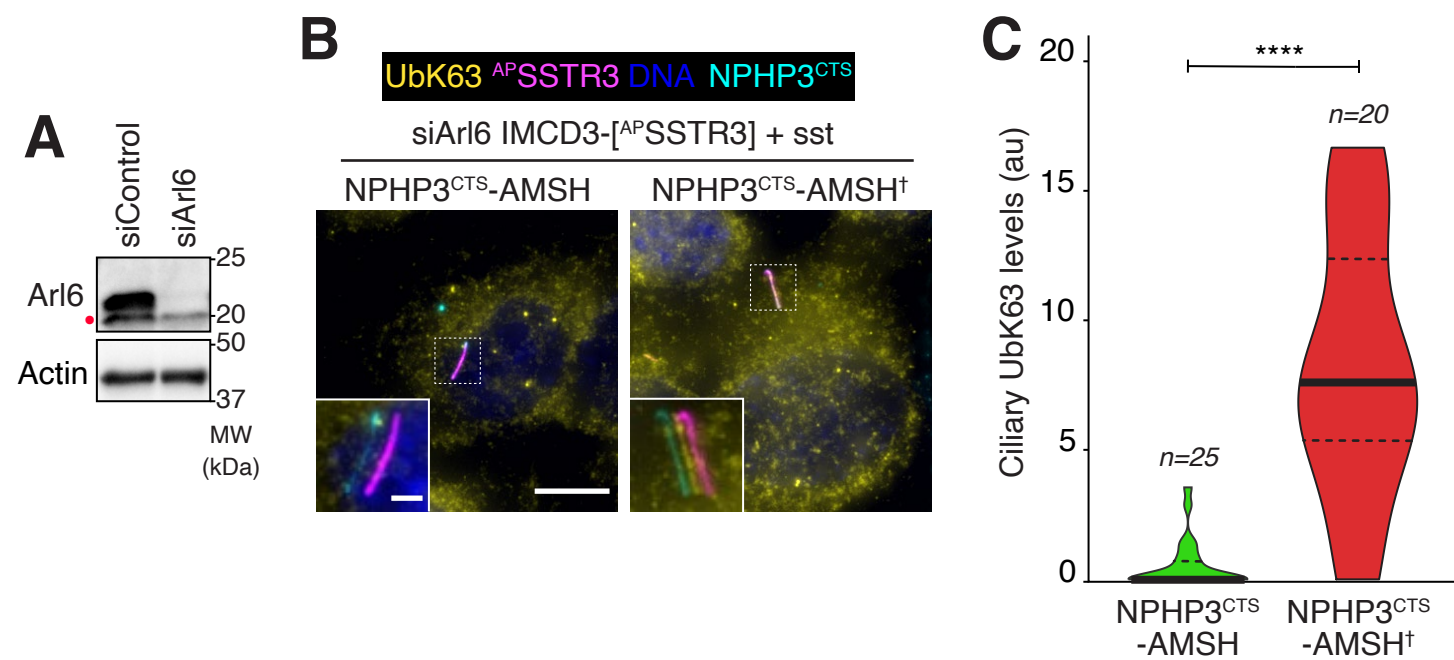

Supplementary figure 4



864 **Figure S2. Fluorescence intensities of WT and cK0 GPCR variants at t=0.**

865 **A.** Ciliary <sup>AP</sup>SSSTR3 was pulse-labeled by addition of Alexa647-conjugated mSA (mSA647) to the  
866 medium for 5-10 min before addition of sst. Violin plots of the ciliary fluorescence intensities for  
867 WT and cK0 SSSTR3 imaged in the far-red channel at t=0 are shown. **B.** Violin plots of the  
868 fluorescence intensities of NG fluorescence corresponding to WT and cK0 GPR161<sup>NG</sup> at t=0 are  
869 shown.

870

871 **Figure S3. Expression levels of ciliary AMSH.**

872 IMCD3-[pEF1 $\alpha^A$ -<sup>AP</sup>SSSTR3; pEF1 $\alpha$ -BirA•ER] cells were transfected with the plasmid expressing  
873 NPHP3<sup>CTS</sup>-AMSH as in Figure 4, before fixation and staining for acetylated tubulin (acTub,  
874 magenta) and DNA (blue). The NPHP3<sup>CTS</sup> fusions were visualized through the intrinsic  
875 fluorescence of GFP (cyan) A representative micrograph is shown. A cell expressing modest levels  
876 of cilia-AMSH is indicated by an arrow and possesses normal ciliary staining of acetylated  
877 tubulin. A cell expressing high levels of cilia-AMSH indicated by an arrowhead displays  
878 abnormal ciliary levels of acetylated tubulin. Cells with high ciliary levels of NPHP3<sup>CTS</sup>-AMSH  
879 were excluded from the analysis and only cells with modest ciliary levels of NPHP3<sup>CTS</sup>-AMSH  
880 were included in the experiment. Scale bar 5 $\mu$ m (main panel), 1 $\mu$ m (inset).

881

882 **Figure S4. Cilia-targeted AMSH removes UbK63 chains from ciliary substrates.**

883 **A.** IMCD3-[pEF1 $\alpha^A$ -<sup>AP</sup>SSSTR3; pEF1 $\alpha$ -BirA•ER] cells were transfected with control or Arl6  
884 siRNAs. Cell lysates were immunoblotted for Arl6 or actin. A non-specific band cross-reacting  
885 with the anti-Arl6 antibody is marked with a dot. **B.** IMCD3-[<sup>AP</sup>SSSTR3; BirA•ER] cells were  
886 transfected with siRNA targeting Arl6 and plasmids expressing NPHP3<sup>CTS</sup>-AMSH or  
887 NPHP3<sup>CTS</sup>-AMSH<sup>†</sup>. Surface-exposed <sup>AP</sup>SSSTR3 was pulse-labeled with mSA647 for 5-10 min  
888 and cells were then treated with sst for 2h before fixation and staining for K63-linked ubiquitin  
889 chains (UbK63, yellow). The NPHP3<sup>CTS</sup>-AMSH fusions were visualized through the intrinsic  
890 fluorescence of GFP (cyan), <sup>AP</sup>SSSTR3 was visualized via mSA647 (magenta) and DNA is blue.

891 Channels are shifted in the insets to facilitate visualization of overlapping ciliary signals. Scale bar  
892 5 $\mu$ m (main panel), 2 $\mu$ m (inset). **C.** The fluorescence intensities of the UbK63 signal inside cilia  
893 are represented as violin plots. Asterisks indicate Mann Whitney test significance value. \*\*\*, p=  
894 <0.0001.  
895  
896  
897

## 898 **MATERIALS AND METHODS**

### 899 **Cell culture**

900 The mouse IMCD3 cell lines used in the study were generated from a parental IMCD3-FlpIn  
901 cell line (gift from P.K. Jackson, Stanford University, Stanford, CA). IMCD3-FlpIn cells were  
902 cultured in DMEM/F12 (11330-057; Gibco) supplemented with 10% FBS (100-106; Gemini  
903 Bio-products), 100 U/ml penicillin-streptomycin (400-109; Gemini Bio-products), and 2 mM L-  
904 glutamine (400-106; Gemini Bio-products). The RPE1-hTERT cell line (ATCC CRL-4000) was  
905 cultured in DMEM/F12 supplemented with 10% FBS, 100 U/ml penicillin-streptomycin, 2 mM  
906 L-glutamine and 0.26% sodium bicarbonate (25080; Gibco).

907 Ciliation was induced by serum starvation in media containing 0.2% FBS for 16 to 24 h.

908

### 909 **Plasmid construction and Generation of stable cell lines**

910 Stable isogenic IMCD3 cell lines were generated using the Flp-In system (ThermoFisher  
911 Scientific). Low-expression promoters and additional expression cassettes were introduced into  
912 pEF5/FRT plasmid as described (Nager et al., 2017; Ye et al., 2018). To reduce expression  
913 levels, the EF1 $\alpha$  promoter was attenuated by mutating the TATA-box (pEF1 $\alpha^{\Delta}$ ) or replaced with  
914 a minimal chicken lens  $\delta$ -crystallin promoter (pCrys).

915 Coding sequences were amplified from plasmids encoding mouse GPR161 (BC028163;  
916 Mammalian Gene Collection [MGC]; GE Healthcare), mouse SSTR3 (gift from Kirk Mykytyn,  
917 Ohio State University, Columbus, OH), and human BBS5 (gifts from V. Sheffield, University of  
918 Iowa, Iowa City, IA), BirA-ER (gift from Alice Ting).  $\beta$ -arrestin 2 (a gift from Mark Scott) was  
919 stably expressed from a pCMV-based plasmid (pEGFP-N). SSTR3 and SMO expression were  
920 driven by pEF1 $\alpha^{\Delta}$ , GPR161 expression by pCrys, and BBS5 expression by pEF1 $\alpha$ . Coding  
921 sequences were fused to GFP, mNeonGreen (NG, (Shaner et al., 2013), or an acceptor peptide  
922 for the biotin ligase BirA (AP) (Howarth and Ting, 2008). Multiple rounds of site-directed  
923 mutagenesis were performed to generate SSTR3-cK0, a variant with all the cytoplasm-facing

924 lysine residues (K233, K330, K356, K407, and K421) mutated to arginine. GPR161-cK0, a  
925 variant with 18 cytoplasm-exposed lysine residues (K83, K84, K93, K167, K247, K250, K269,  
926 K296, K358, K362, K455, K469, K473, K481, K486, K497, K504, and K548) mutated to  
927 arginine, was gene synthesized (GenScript). Cilia-AMSH was generated by fusing the catalytic  
928 domain of mouse AMSH (gift from David Komander; Addgene plasmid #66712; (Michel et al.,  
929 2015) with NPHP3(1-200) and GFP to create NPHP3[1-200]-GFP-AMSH[243-424]. A  
930 catalytically dead version of AMSH was generated by mutating the water-activating Glu280  
931 residue to Ala (Sato et al., 2008; Huang et al., 2013). pRK5-HA-Ubiquitin WT, K0 (all seven  
932 acceptor lysine residues – K6, K11, K27, K29, K33, K48, and K63, are mutated to arginine),  
933 and K63 only (all lysines except K63 mutated to arginines)(gift from Ted Dawson; Addgene  
934 plasmid numbers – 17608, 17603, and 17606 respectively).

935 CRISPR-edited *Arl6*<sup>-/-</sup> and *Arl6*<sup>-/-</sup>/*Arb2*<sup>-/-</sup> cell lines were described previously (Liew et al., 2014;  
936 Nager et al., 2017). The genotypes are *Arl6*, NM\_001347244.1:c.- 10\_25del; c.3\_6del; and *Arb2*,  
937 NM\_001271358.1:c.1 12del;c112\_113del.

938

### 939 **Transfection**

940 For generation of all stable cell lines except for the ones expressing  $\beta$ -arrestin 2<sup>GFP</sup>, FRT-based  
941 plasmids were reverse transfected using XtremeGene9 (Roche) into IMCD3 Flp-In cells along  
942 with a plasmid encoding the Flp recombinase (pOG44) and stable transformants were selected by  
943 blasticidin resistance (4  $\mu$ g/ml). The transfection mixture was then added to the cells. pEGFP-N•  
944  $\beta$ -arrestin 2-GFP was transfected into IMCD3 cells using Lipofectamine 2000, and clones were  
945 selected using neomycin resistance.

946

### 947 **Antibodies and drug treatments**

948 The following monoclonal antibodies were used for immunofluorescence: anti-acetylated tubulin  
949 (mouse; clone 6-11B-1; Sigma-Aldrich; 1:500), anti-ubiquitin clone FK2 was used in all

950 experiments except where indicated (mouse; D058-3; Medical and Biological Laboratories;  
951 1:500), anti-ubiquitin FK1 in **Fig. S1A-B** (mouse; D071-3; Medical and Biological Laboratories;  
952 1:500), anti-ubiquitin K48 linkage (rabbit; clone Apu2; 05-1307; Millipore-Genentech; 1:500),  
953 anti-ubiquitin K63 linkage (human; clone Apu3; a gift from Genentech; 1:500). The following  
954 monoclonal antibodies were used for immunoblotting: anti-ubiquitin (mouse; clone P4D1; 3936;  
955 Cell Signaling; 1:1000), anti- $\alpha$  tubulin (mouse; clone DM1A; MS-581-P1ABX; Thermo  
956 Scientific; 1:1000), anti-HA (mouse; clone 16B12; 901501; Biolegend; 1:500), streptavidin-HRP  
957 (Pierce-21140; Thermo Scientific; 1:10000). The following polyclonal antibodies were used for  
958 immunofluorescence: anti-GPR161 (rabbit; 13398-1-AP; Proteintech; 1:100), anti-Smoothed  
959 (rabbit; a gift from Kathryn Anderson, Memorial Sloan Kettering Cancer Center, New York,  
960 NY; 1:500), anti-cone-arrestin (rabbit; AB15282; Millipore; 1:500). Biotinylated SSTR3 and  
961 GPR161 were detected using Alexa Fluor 647-labeled monovalent streptavidin (mSA647) (Ye et  
962 al., 2018). The following reagents were used at the indicated concentrations: 200 nM SAG and  
963 10  $\mu$ M somatostatin 14. Somatostatin 14 stocks were made in DMEM/F12 media, HEPES, no  
964 phenol red (11039-021, GIBCO). SAG was dissolved in DMSO (276855, Sigma-Aldrich).

965

## 966 **Imaging and microscopy**

967 Cells were imaged either on a DeltaVision system (Applied Precision) equipped with a PlanApo  
968 60x/1.40 objective lens (Olympus), CoolSNAP HQ2 camera (Photometrics), and solid-state  
969 illumination module (InsightSSI), or on a confocal LSM 700 (Zeiss) microscope equipped with  
970 40x Plan-Apochromat 1.3 DIC oil objective. Z stacks were acquired at 0.5  $\mu$ m interval (LSM  
971 700, Figs. 1, 3, 7, and S1) or 0.2  $\mu$ m interval (DeltaVision, Figs. 4, 6, S3, and S4).

972 For fixed imaging, 60,000 cells were seeded on acid-washed coverglass (12 mm #1.5; 12-545-81;  
973 Thermo Fisher Scientific). Cells were grown for 24 h and then starved for 16-24 h in 0.2% FBS  
974 media before experimental treatment. After treatment, cells were fixed with 4%  
975 paraformaldehyde in PBS for 15 min at 37°C and extracted in -20°C methanol for 5 min. Cells  
976 were then permeabilized in IF buffer (PBS supplemented with 0.1% Triton X-100, 5% normal

977 donkey serum (017-000-121; Jackson ImmunoResearch Laboratories), and 3% bovine serum  
978 albumin (BP1605-100; Thermo Fisher Scientific)), incubated at room temperature for 1h with  
979 primary antibodies diluted in IF buffer, washed three times in IF buffer, incubated with  
980 secondary antibodies (Jackson ImmunoResearch Laboratories) diluted in IF buffer for 30 min,  
981 and washed three times with IF buffer. DNA was stained with Hoechst 33258 (H1398; Molecular  
982 Probes), cells were washed twice more with PBS, and coverglass mounted on slides using  
983 fluoromount-G (17984-25; Electron Microscopy Sciences).

984 For live-cell imaging, 300,000 cells were seeded on acid-washed 25mm cover glass (Electron  
985 Microscopy Sciences). After 24 h of growth, cells were serum starved for 16 h and transferred to  
986 the DeltaVision stage for imaging at 37°C within an environmental chamber that encloses the  
987 microscope and the stage. Cells were imaged in DMEM/F12 media, HEPES, no phenol red  
988 (11039-021, GIBCO). To measure SSTR3 exit, cells expressing <sup>AP</sup>SSTR3 were first washed three  
989 times with PBS and then pulse-labeled with 2µg/ml mSA647 for 5 min at 37°C. Cells were then  
990 imaged after addition of sst (for SSTR3) or SAG (for GPR161) for 2 h with an acquisition every  
991 10 min. Each acquisition consisted of a 3-plane Z-stack with each plane separated by 0.5 µm.  
992 Transmittance was set to 5% and exposure time to 500 ms.

993 WT or *Bbs4*<sup>-/-</sup> mice (Mykytyn et al., 2004) eyes were enucleated at P21. Whole eyes were fixed in  
994 4% paraformaldehyde/PBS overnight at 4°C and then washed three times with PBS. The eyes  
995 were infiltrated in 30% sucrose/PBS at 4 °C overnight. Eyes were placed in OCT compound  
996 embedding medium (4583; Tissue-Tek), frozen on dry ice, and stored at -80 °C. 14 µm sections  
997 were cut on a cryostat (CM 1850; Leica). Sections were processed for immunofluorescence as  
998 follows. Sections were blocked in blocking solution (50 mM Tris pH7.4, 100 mM NaCl, 0.1%  
999 Triton-X 100, 3% normal donkey serum, and 0.1% BSA) for 1 h at room temperature, then  
1000 incubated with primary antibodies overnight at 4°C, followed by three washes in wash solution  
1001 (50 mM Tris pH7.4, 100 mM NaCl, and 0.1% TX100). After rinsing in wash solution, sections  
1002 were incubated with secondary antibodies for 1 h at room temperature. DNA was counterstained  
1003 using Hoechst 33258 dye, sections washed twice more with PBS, and mounted on slides using  
1004 Fluoromount-G. Sections were imaged on Confocal LSM 700 (Zeiss ) microscope.

1005

## 1006 **Image analysis**

1007 Files were imported from the Deltavision or LSM700 workstations into ImageJ/ Fiji (National  
1008 Institutes of Health) for analysis. For the quantification of ciliary ubiquitin signal in fixed cells,  
1009 maximum intensity projections were used. The ciliary ubiquitin intensity was measured using the  
1010 following equation:

$$1011 F_{\text{Ub-cilia}} = F_{\text{Ub-cilia\_measured}} - F_{\text{background}}$$

1012  $F_{\text{Ub-cilia\_measured}}$  is the total ciliary ubiquitin fluorescence detected,  $F_{\text{background}}$  is the background  
1013 ubiquitin fluorescence measured in the adjacent area. For all measurements, the fluorescence  
1014 integrated density was used.  $F_{\text{Ub-cilia}}$  were plotted as violin plots using the PlotsOfData web tool  
1015 (<https://huygens.science.uva.nl/PlotsOfData/>). Each violin represents the distribution of data,  
1016 which includes all the data points. Median and interquartile range is marked by solid and dotted  
1017 lines, respectively. No gamma adjustment was applied during figure preparation; all the  
1018 representative micrographs for respective panels are displayed within the same dynamic range.  
1019 For some representative micrographs, the most in-focus plane was used rather than the  
1020 maximum intensity projection (Fig.3, and Fig. 6, panel A and C).

1021 To measure SSTR3 exit, the integrated density of Alexa Fluor 647 fluorescence in the maximum  
1022 intensity projection was measured for each time point. The cilia-adjacent fluorescence was  
1023 subtracted as the background, and a mathematical photobleaching correction was applied:

1024  $F_{\text{cilia}} = (F_{\text{mSA647\_measured}}/F_{\text{mSA647\_1}}) + ((1 - e^{-\lambda}) * (n - 1))$ , where  $\lambda$  is the photobleaching decay  
1025 constant,  $n$  is the number of images taken,  $F_{\text{mSA647\_measured}}$  is the integrated mSA647 fluorescence  
1026 measured for image  $n$ ,  $F_{\text{mSA647\_1}}$  is the measurement for the first time point, and  $F_{\text{cilia}}$  is the  
1027 reported fluorescence. In this equation,  $F_{\text{cilia}}$  is reported in relative fluorescence units (RFUs).

1028 <sup>AP</sup>GPR161<sup>3NG</sup> exit was followed similarly with the difference that NG fluorescence intensity was  
1029 measured. For SSTR3 as well as GPR161, photobleaching corrected data ( $F_{\text{cilia}}$ ) for each  
1030 condition were linearly fitted ( $F_{\text{cilia}} = m * \text{time} + c$ ) and plotted in Excel.

1031 Endocytosed SSTR3 foci were revealed by contrast enhancement and counted with the ImageJ  
1032 particle analysis tool.

### 1033 ***Chlamydomonas* culture, isolation of flagella and immunofluorescence**

1034 *Chlamydomonas* WT- g1 (nit1, agg1, mt+) [gift from George B. Witman, University of  
1035 Massachusetts Medical School, Worcester, Massachusetts] and *Bbs4*- CC-4377 ptx5-1/bbs4-1::  
1036 NIT1 agg1 mt+ (*Chlamydomonas* Resource Center) strains were cultured asynchronously under  
1037 light in TAP media (Gorman and Levine, 1965) for 72 h. Flagellar fractions were prepared from  
1038 two liters of cultures of WT or *Bbs4* cells as described (Craigie et al., 2013). Briefly, cells were  
1039 harvested by centrifugation for 5 min at 2,000 rpm (1,100 x g) at room temperature. Cells were  
1040 resuspended in 10 mM HEPES, pH 7.4 and centrifuged for 5 min at 2,000 rpm (1,100 x g). Next,  
1041 the cell pellet was gently resuspended in ice-cold HMDS (10 mM HEPES, pH 7.4, 5 mM  
1042 MgSO<sub>4</sub>, 1 mM DTT, and 4% (w/v) sucrose). Deflagellation was achieved by addition of 5 mM  
1043 dibucaine to each tube of cells and by pipetting up and down ~10 times using a 10-ml plastic  
1044 serological pipette. The suspension was spun for 5 min at 1,800 x g at 4°C. The supernatant  
1045 containing flagella was underlaid with 9 ml ice-cold HMDS-25% sucrose (10 mM HEPES, pH  
1046 7.4, 5 mM MgSO<sub>4</sub>, 1 mM DTT, and 25% (w/v) sucrose), followed by a centrifugation step for 10  
1047 min at 2,800 rpm (2,400 x g), 4°C. The supernatant above the sucrose interface was collected  
1048 using a 25-ml serological pipette and flagella were pelleted by centrifugation for 20 min at 30,000  
1049 x g (16,000 rpm), 4°C. The flagellar pellet was resuspended in 100 µl HMDS buffer. Protein  
1050 concentrations were measured by Bradford and 25 µg were resolved by SDS-PAGE for  
1051 immunoblotting.

1052 *Chlamydomonas* immunofluorescence was performed as follows. Cells were fixed with 4 %  
1053 paraformaldehyde in MT buffer\* (30 mM HEPES, pH7, 5 mM EGTA, 5 mM MgSO<sub>4</sub>, and  
1054 25mM KCl) for 20 minutes in suspension. The cells were centrifuged at 1000 rpm for 5 minutes,  
1055 resuspended in 100 µl of fixative and transferred onto slides coated with 1 mg/ml poly-L-lysine.  
1056 After 5 minutes, the unadhered cells were washed off by rinsing with PBS. Cells were  
1057 permeabilized in 0.5% Triton-X 100 for 20 minutes followed by blocking for 1 h in blocking  
1058 buffer (3% fish skin gelatin, 1% BSA, 0.1% Tween20 in PBS) at room temperature. Cells were



1059 incubated at 4°C overnight with primary antibodies diluted in blocking buffer, washed five times  
1060 in PBS and incubated with secondary antibodies for 2 h at room temperature. After five washes  
1061 in PBS, coverglasses were mounting on slides using Fluoromount-G. Cells were imaged on the  
1062 LSM700 confocal microscope.

1063

#### 1064 **Biochemical analysis of SSTR3 ubiquitination**

1065 IMCD3 cells stably expressing pEF1 $\alpha^{\Delta}$ -APSSSTR3<sup>NG</sup> and BirA-ER were transiently transfected  
1066 with HA-tagged ubiquitin plasmids. Cells were reverse transfected using XtremeGene9 and  
1067 plated into 15 cm plates. Cells were moved to medium containing 0.2% serum and  
1068 supplemented with 10  $\mu$ M biotin 24 h after transfection to promote ciliation and maximize  
1069 biotinylation of SSTR3. 18h after the medium change, sst was added for 0, 10 or 20 min. The  
1070 assay was stopped by washing cells twice with ice-cold 1xPBS and scraping cells off on ice into  
1071 1ml of ice-cold RIPA buffer (50 mM Tris/HCl pH 8, 150 mM NaCl, 1% Nonidet P-40, 0.5%  
1072 sodium deoxycholate, 0.1% SDS, 100 mM iodoacetamide, 10mM EDTA) supplemented with  
1073 protease inhibitors (1 mM AEBSF, 0.8 mM Aprotinin, 15 mM E-64, 10 mg/mL Bestatin, 10  
1074 mg/mL Pepstatin A and 10 mg/mL Leupeptin). After gently rocking at 4°C for 5 minutes,  
1075 lysates were clarified by spinning in a tabletop Eppendorf centrifuge at 15,000 rpm and 4°C for  
1076 20 minutes. Each clarified lysate was incubated with 50 $\mu$ l of streptavidin Sepharose beads (GE  
1077 Healthcare) for 1 h at 4°C to capture biotinylated SSTR3. Beads were washed four times with  
1078 500 $\mu$ l of RIPA buffer and bound proteins were eluted by heating the beads in 1X LDS sample  
1079 loading buffer containing 2 mM biotin at 70°C for 10 minutes. After SDS-PAGE and transfer,  
1080 PVDF membranes were probed with anti-HA antibody and streptavidin-HRP.  
1081 Signals were acquired with a ChemiDoc imager (Bio-Rad) and analyzed with ImageLab 6.0.1  
1082 (Bio-Rad). The integrated densities of the SSTR3 bands in the streptavidin-HRP blot were  
1083 normalized to the integrated densities of the endogenous biotinylated proteins to correct for  
1084 variations in the recovery of biotinylated proteins on streptavidin Sepharose. The resulting value  
1085 is SSTR3<sub>bio</sub>. Second, the integrated densities of ubiquitinated SSTR3 were collected by

1086 measuring the area from 100 kDa to the top of the gel on the HA blot. The values were  
1087 background-corrected by subtracting the value of the equivalent area in the IMCD3 control lane.  
1088 The resulting value is  $Ub\text{-}SSTR3_{raw}$ . The relative amount of SSTR3 that is ubiquitinated,  $Ub\text{-}$   
1089  $SSTR3_{frac} = Ub\text{-}SSTR3_{raw}/SSTR3_{bio}$  was plotted on the graphs using PlotsOfData (Postma and  
1090 Goedhart, 2019).  
1091
